# Supplementary material for: Synthesis and Glycosidase Inhibition of Broussonetine M and Its Analogues
Source: PubMed Central journal article supplement (PMC6832352; doi:10.3390/molecules24203712), 2019-10-15
Supplement: molecules-24-03712-s001.pdf [file molecules-24-03712-s001.pdf]

# Synthesis and Glycosidase Inhibition of Broussonetine M and Its Analogues

Qing-Kun Wu <sup>1,4</sup>, Kyoko Kinami <sup>2</sup>, Atsushi Kato <sup>2,\*</sup>, Yi-Xian Li <sup>1,4</sup>, Yue-Mei Jia <sup>1,4</sup>, George W. J. Fleet <sup>3,5</sup>, and Chu-Yi Yu <sup>1,4,5,\*</sup>

<sup>1</sup> Beijing National Laboratory for Molecular Science (BNLMS), CAS Key Laboratory of Molecular Recognition and Function, Institute of Chemistry, Chinese Academy of Sciences, Beijing 100190, China; lsqkwu@iccas.ac.cn (Q.-K.W.); tamarali@iccas.ac.cn (Y.-X.L.); jiayumei@iccas.ac.cn (Y.-M.J.); yucy@iccas.ac.cn (C.-Y.Y.)

<sup>2</sup> Department of Hospital Pharmacy, University of Toyama, 2630 Sugitani, Toyama 930-0194, Japan; kimagure1242@yahoo.co.jp (K.K.); kato@med.u-toyama.ac.jp (A.K.)

<sup>3</sup> Chemistry Research Laboratory, Department of Chemistry, University of Oxford, Mansfield Road, Oxford, post code OX13TA, UK; george.fleet@chem.ox.ac.uk (G.W.J.F.)

<sup>4</sup> University of Chinese Academy of Sciences, Beijing 100049, China

<sup>5</sup> National Engineering Research Center for Carbohydrate Synthesis, Jiangxi Normal University, Nanchang 330022, PR China

\* Correspondence: kato@med.u-toyama.ac.jp (A.K.); yucy@iccas.ac.cn (C.-Y.Y.); Tel.: +86-010-626-12893 (C.-Y.Y.)

## Supporting Information

### Contents

|                                                                                                                                                   |    |
|---------------------------------------------------------------------------------------------------------------------------------------------------|----|
| 1. Comparison of NMR Data of the synthetic broussonetine M ( <b>3</b> ) with natural product and the synthetic broussonetine M in literature..... | S2 |
| 2. Copies of NMR spectra for all new compounds.....                                                                                               | S6 |
| 3. HPLC Analysis of Compounds <b>15</b> and <i>ent-15</i> .....                                                                                   | S6 |

## 1. Comparison of NMR data of the synthetic broussonetine M (3) with natural product and the synthetic broussonetine M in literature

**Table S1.** Comparison of <sup>1</sup>H NMR of the synthetic broussonetine M (3) with natural product and the synthetic broussonetine M of J. Alberto Marco

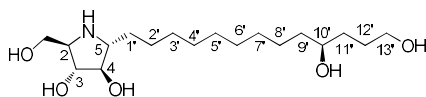

|                         |                    | Natural Product <sup>b</sup>                                              | Synthetic Broussonetine M (lit.) <sup>c</sup>                           | Compound 3                                              |
|-------------------------|--------------------|---------------------------------------------------------------------------|-------------------------------------------------------------------------|---------------------------------------------------------|
|                         |                    | (500 MHz, C <sub>5</sub> D <sub>5</sub> N)                                | (500 MHz, C <sub>5</sub> D <sub>5</sub> N)                              | (500 MHz, C <sub>5</sub> D <sub>5</sub> N)              |
| <b>Pyrrolidine Ring</b> | CH <sub>2</sub> OH | 4.15 (dd, <i>J</i> = 11.0, 5.9 Hz),<br>4.22 (dd, <i>J</i> = 11.0, 5.9 Hz) | 4.45 (dd, <i>J</i> = 22.5, 5.5 Hz),<br>4.41 (dd, <i>J</i> = 11.5, 5 Hz) | 4.49–4.42 (m, 2H)                                       |
|                         | 2                  | 3.75 (m)                                                                  | 4.26 (m)                                                                | 4.31–4.28 (m, 1H)                                       |
|                         | 3                  | 4.62 (t, <i>J</i> = 6.4 Hz)                                               | 4.90 (t, <i>J</i> = 7 Hz)                                               | 4.92 (t, <i>J</i> = 6.7 Hz)                             |
|                         | 4                  | 4.36 (t, <i>J</i> = 6.4 Hz)                                               | 4.65 (t, <i>J</i> = 7 Hz)                                               | 4.67 (t, <i>J</i> = 7.1 Hz)                             |
|                         | 5                  | 3.45 (m)                                                                  | 4.05 (br, q, <i>J</i> = 7.5 Hz)                                         | 4.09–4.05 (m, 1H)                                       |
| <b>Side Chain</b>       | 1'                 | 1.70 (m) <sup>a</sup> , 2.00 (m) <sup>a</sup>                             | 2.15–2.10 (m, 1H), 2.05–2.00 (m, 1H)                                    | 2.15–2.09 (m, 1H), 2.03–1.97 (m, 1H)                    |
|                         | 2'                 | 1.66–1.16                                                                 | 1.90–1.50 (m)                                                           | 1.90–1.79 (m) <sup>a</sup> , 1.74–1.56 (m) <sup>a</sup> |
|                         | 3'                 | 1.66–1.16                                                                 | 1.40–1.15 (m) <sup>a</sup>                                              | 1.33–1.07 (m)                                           |
|                         | 4'                 | 1.66–1.16                                                                 | 1.40–1.15 (m) <sup>a</sup>                                              | 1.33–1.07 (m)                                           |
|                         | 5'                 | 1.66–1.16                                                                 | 1.40–1.15 (m) <sup>a</sup>                                              | 1.33–1.07 (m)                                           |
|                         | 6'                 | 1.66–1.16                                                                 | 1.40–1.15 (m) <sup>a</sup>                                              | 1.33–1.07 (m)                                           |
|                         | 7'                 | 1.66–1.16                                                                 | 1.40–1.15 (m) <sup>a</sup>                                              | 1.33–1.07 (m)                                           |
|                         | 8'                 | 1.66–1.16                                                                 | 1.90–1.50 (m) <sup>a</sup>                                              | 1.74–1.56 (m) <sup>a</sup> , 1.48–1.45 (m, 1H)          |
|                         | 9'                 | 1.63 (m) <sup>a</sup> , 1.70 (m) <sup>a</sup>                             | 1.90–1.50 (m) <sup>a</sup>                                              | 1.74–1.56 (m) <sup>a</sup>                              |
|                         | 10'                | 3.90 (m)                                                                  | 3.90 (m)                                                                | 3.92–3.87 (m 1H)                                        |
|                         | 11'                | 1.86 (m)                                                                  | 1.90–1.50 (m) <sup>a</sup>                                              | 1.90–1.79 (m) <sup>a</sup>                              |
|                         | 12'                | 2.00 (m) <sup>a</sup> , 2.12 (m)                                          | 2.30–2.25 (br, m)                                                       | 2.34–2.29 (m, 2H)                                       |
|                         | 13'                | 3.95 (t, <i>J</i> = 6.4 Hz)                                               | 3.96 (t, <i>J</i> = 6.5 Hz)                                             | 3.96 (t, <i>J</i> = 6.4 Hz)                             |

a) Overlapped signals; b) Shibano, M.; Tsukamoto, D.; Fujimoto, R.; Masui, Y.; Sugimoto, H.; Kusano, G. Studies on the Constituents of Broussonetia Species. VII. Four New Pyrrolidine Alkaloids, Broussonetines M, O, P, and Q, as Inhibitors of Glycosidase, from Broussonetia kazinoki SIEB. *Chem. Pharm. Bull.* **2000**, *48*, 1281–1285; c) Ribes, C.; Falomir, E.; Murga, J.; Carda, M.; Alberto Marco, J. Convergent, stereoselective syntheses of the glycosidase inhibitors broussonetines D and M. *Org. Biomol. Chem.* **2009**, *7*, 1355–1360.

**Table S2.** Comparison of  $^{13}\text{C}$  NMR of the synthetic broussonetine M (**3**) with natural product and the synthetic broussonetine M of J. Alberto Marco

|                         |                    | Natural Product <sup>b</sup>               | Synthetic Broussonetine M (lit.) <sup>c</sup> | Compound <b>3</b>                          |
|-------------------------|--------------------|--------------------------------------------|-----------------------------------------------|--------------------------------------------|
|                         |                    | (500 MHz, C <sub>5</sub> D <sub>5</sub> N) | (500 MHz, C <sub>5</sub> D <sub>5</sub> N)    | (500 MHz, C <sub>5</sub> D <sub>5</sub> N) |
| <b>Pyrrolidine Ring</b> | CH <sub>2</sub> OH | 63.45                                      | 59.2                                          | 59.7                                       |
|                         | 2                  | 64.17                                      | 65.0                                          | 65.2                                       |
|                         | 3                  | 80.23                                      | 76.2                                          | 76.7                                       |
|                         | 4                  | 84.01                                      | 80.3                                          | 80.7                                       |
|                         | 5                  | 62.01                                      | 62.7                                          | 63.0                                       |
| <b>Side Chain</b>       | 1'                 | 35.44                                      | 30.2                                          | 30.3                                       |
|                         | 2'–8'              | 30.10                                      | 29.9                                          | 29.9                                       |
|                         |                    | 30.07                                      | 29.7                                          | 29.8                                       |
|                         |                    | 29.94                                      | 29.5                                          | 29.6                                       |
|                         |                    | 29.88                                      | 29.4                                          | 29.5                                       |
|                         |                    | 29.83                                      | 29.3                                          | 29.4                                       |
|                         |                    | 27.22                                      | 26.6                                          | 26.7                                       |
|                         | 26.29              | 26.1                                       | 26.3                                          |                                            |
|                         | 9'                 | 38.27                                      | 38.3                                          | 38.5                                       |
|                         | 10'                | 70.94                                      | 70.8                                          | 70.9                                       |
|                         | 11'                | 34.93                                      | 35.1                                          | 35.2                                       |
| 12'                     | 30.17              | 31.5                                       | 31.9                                          |                                            |
| 13'                     | 62.34              | 62.3                                       | 62.4                                          |                                            |

a) Shibano, M.; Tsukamoto, D.; Fujimoto, R.; Masui, Y.; Sugimoto, H.; Kusano, G. Studies on the Constituents of Broussonetia Species. VII. Four New Pyrrolidine Alkaloids, Broussonetines M, O, P, and Q, as Inhibitors of Glycosidase, from Broussonetia kazinoki SIEB. *Chem. Pharm. Bull.* **2000**, *48*, 1281-1285; b) Ribes, C.; Falomir, E.; Murga, J.; Carda, M.; Alberto Marco, J. Convergent, stereoselective syntheses of the glycosidase inhibitors broussonetines D and M. *Org. Biomol. Chem.* **2009**, *7*, 1355-1360.

Copies of NMR spectra for all new compounds

Compound 21

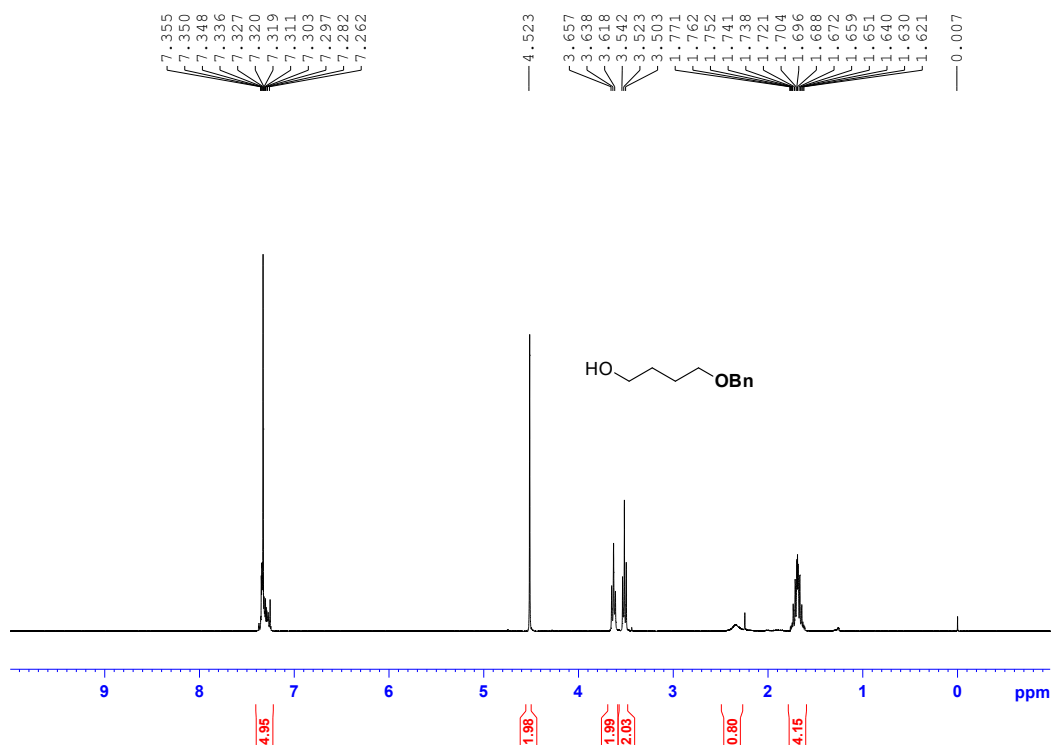

Figure S1

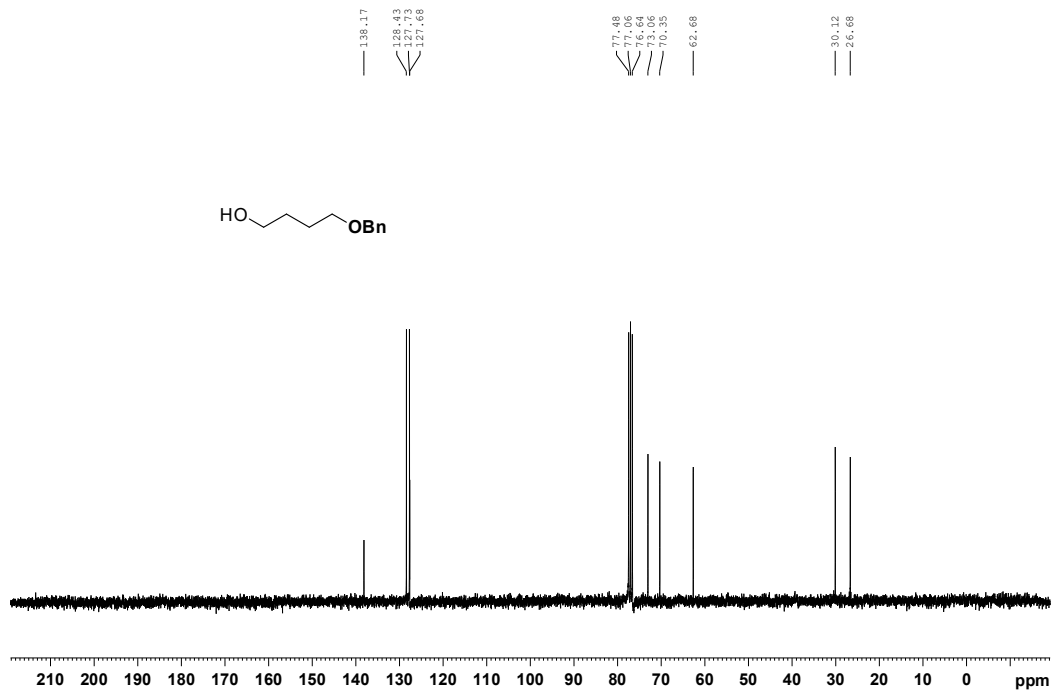

Figure S2



# Compound 16

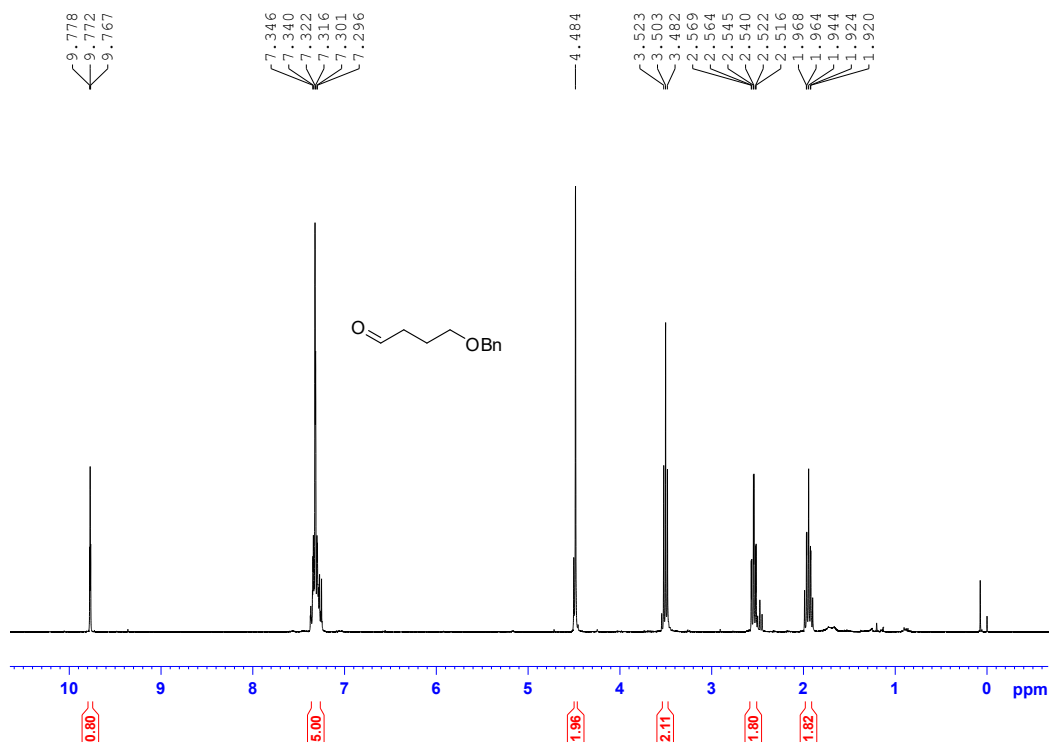

Figure S3

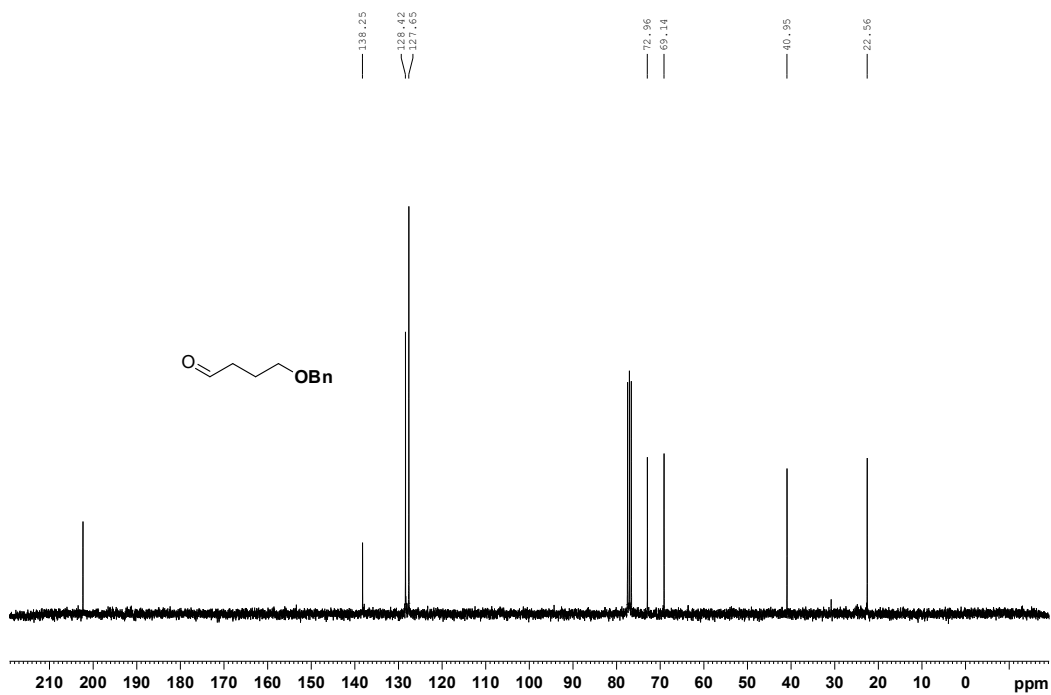

Figure S4



# Compound 15

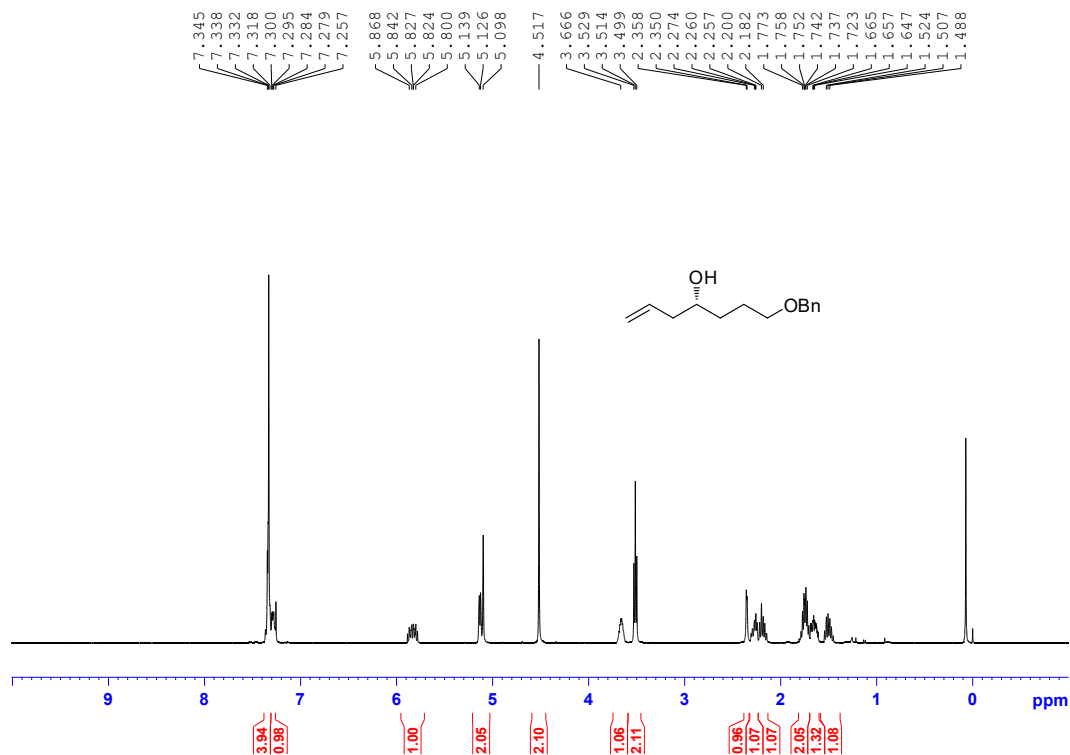

Figure S7

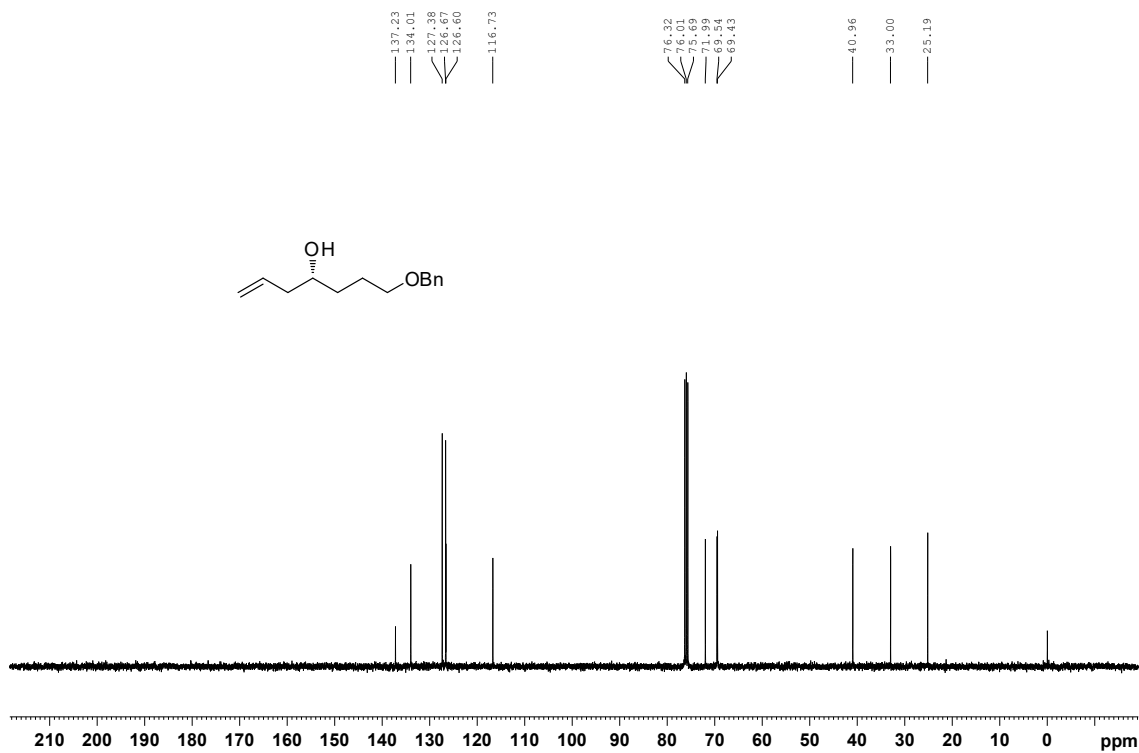

Figure S8

# Compound 19

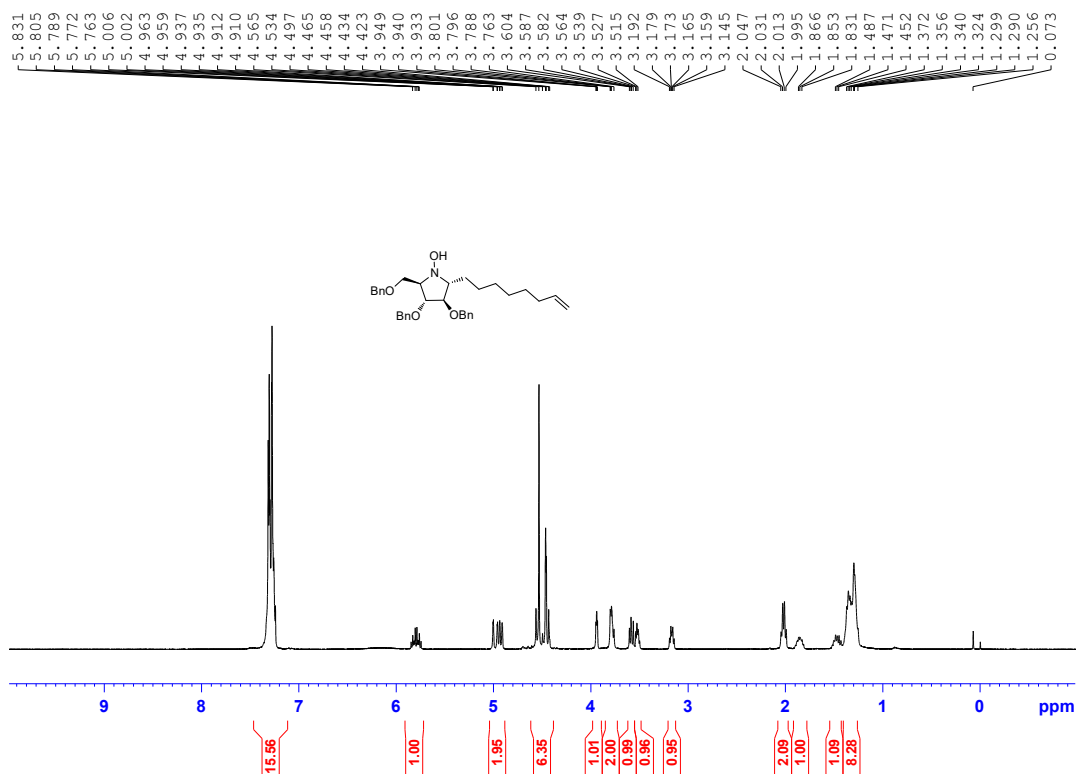

Figure S9

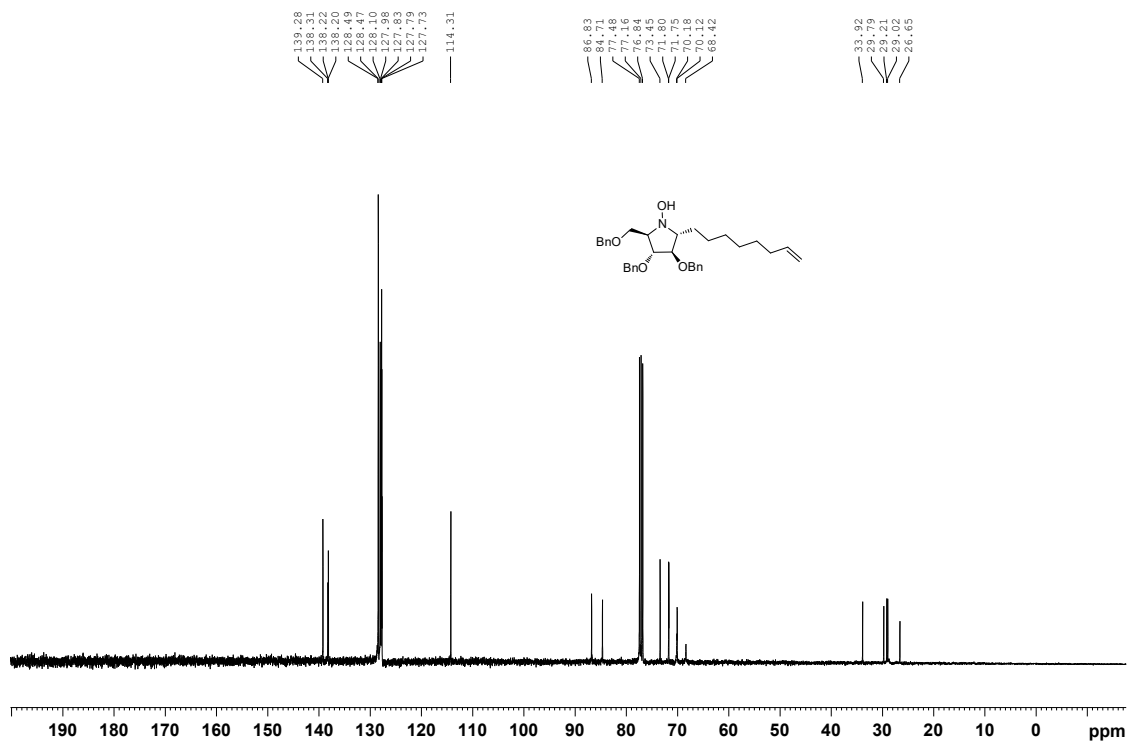

Figure S10

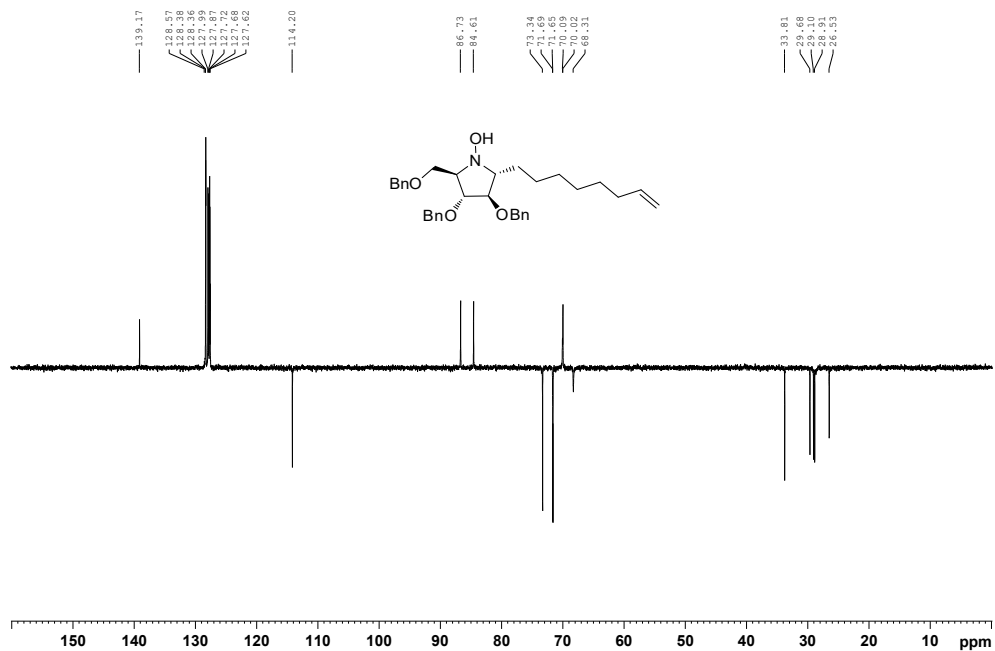

Figure S11

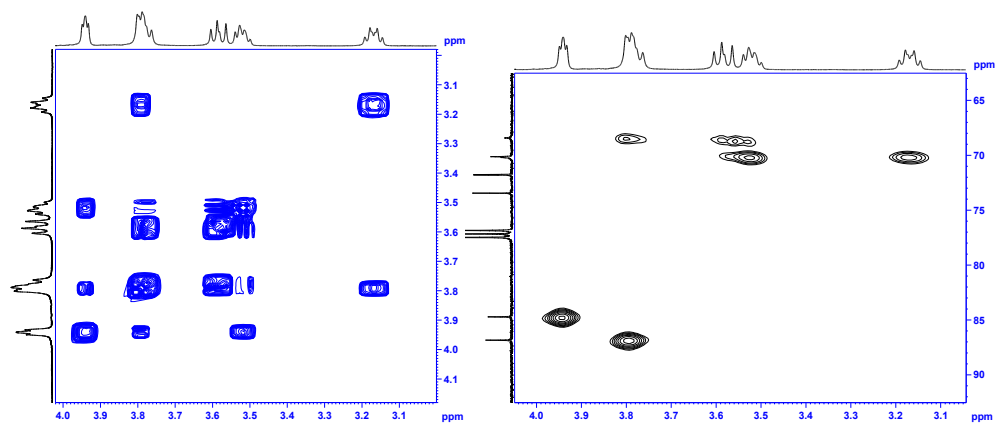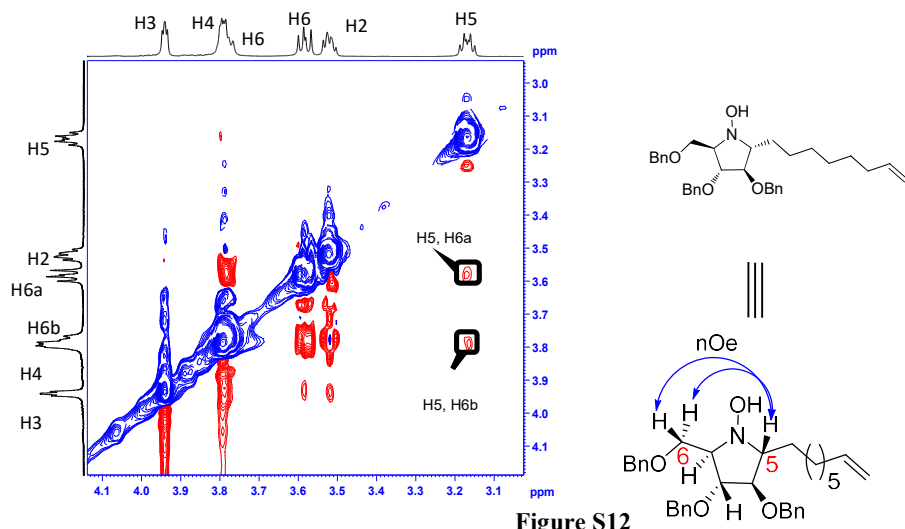

Figure S12

# Compound *ent*-19

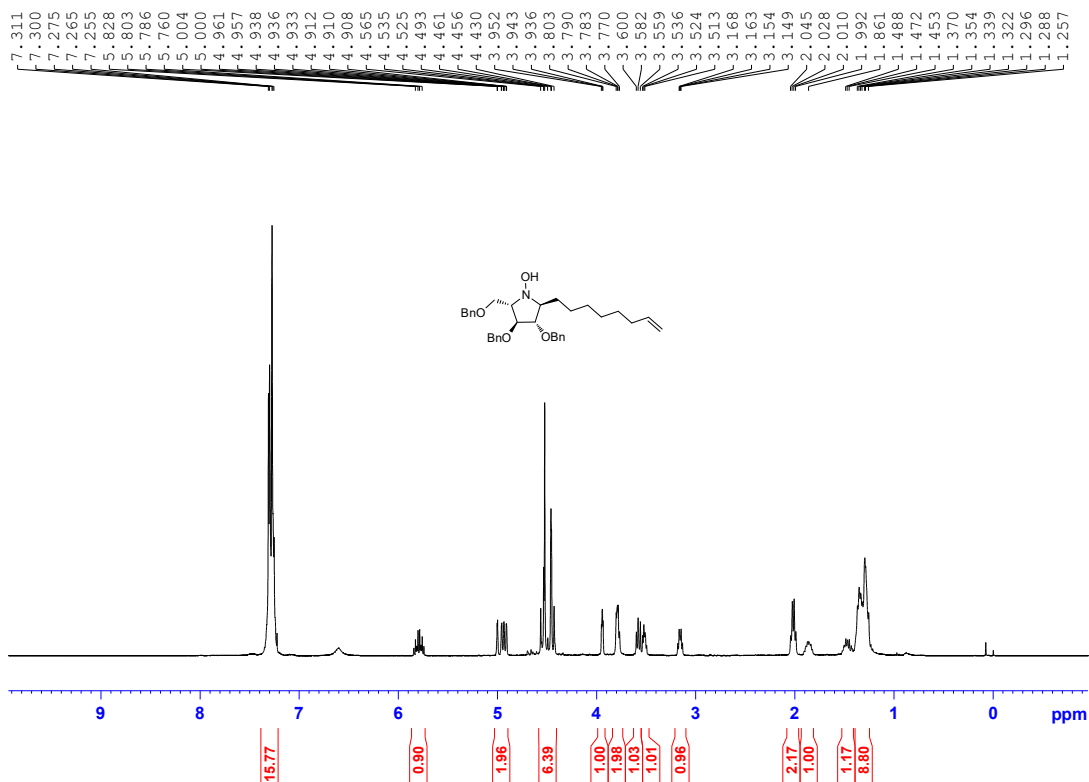

Figure S13

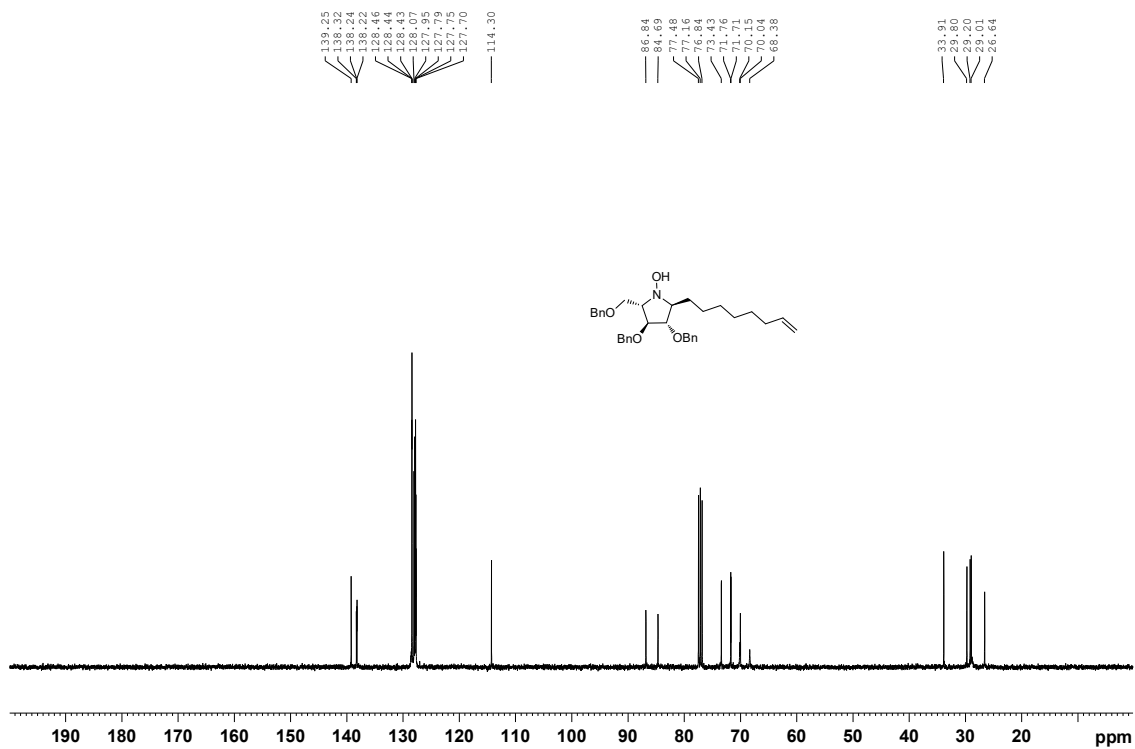

Figure S14

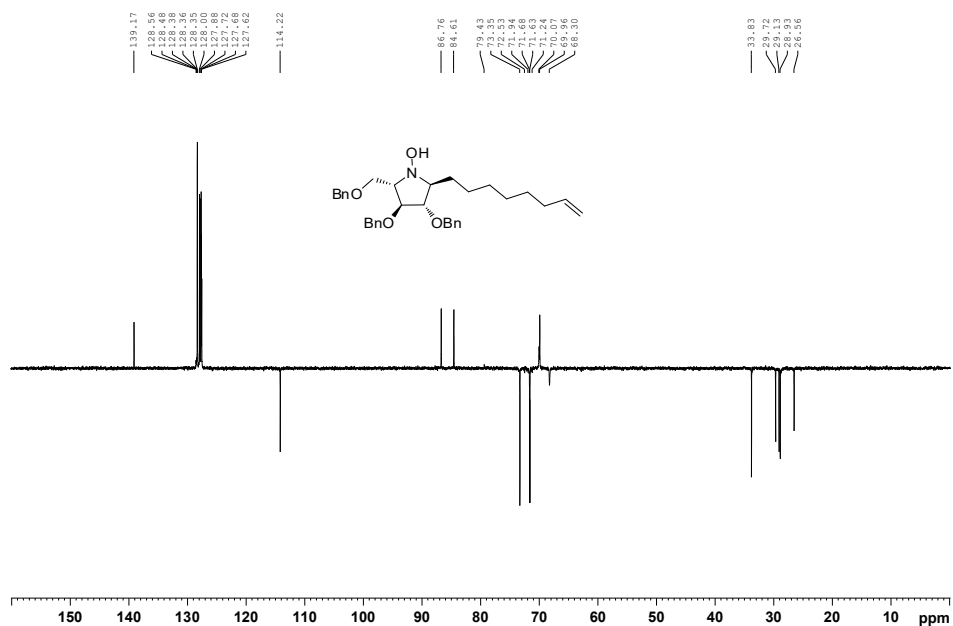

Figure S15

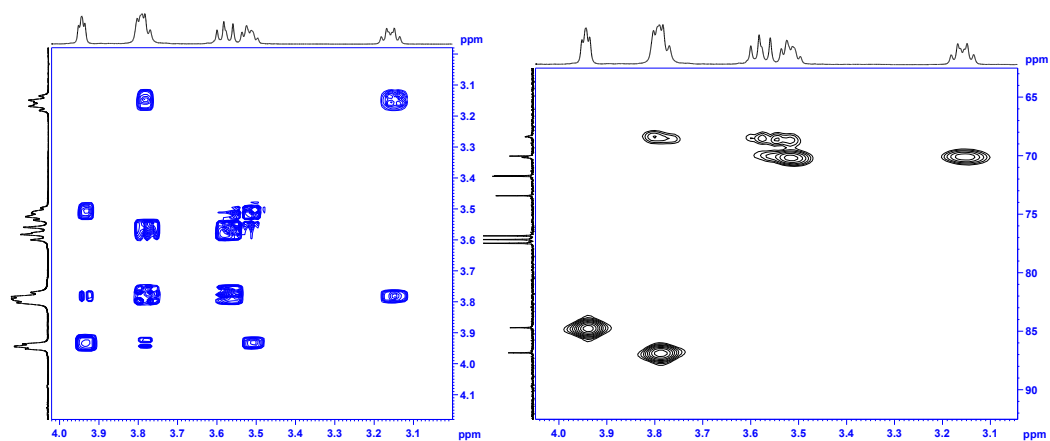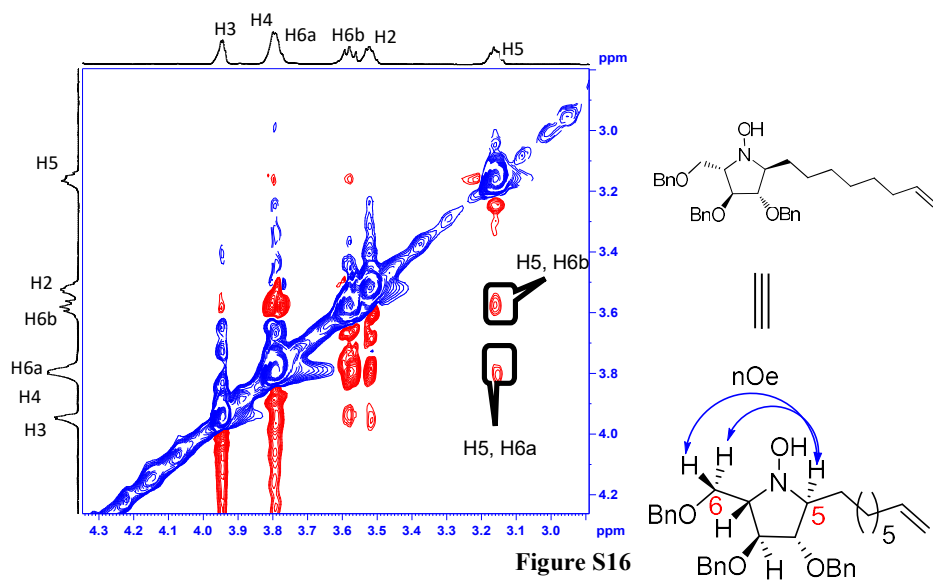

Figure S16

**Compound *ent*-3-*epi*-19**

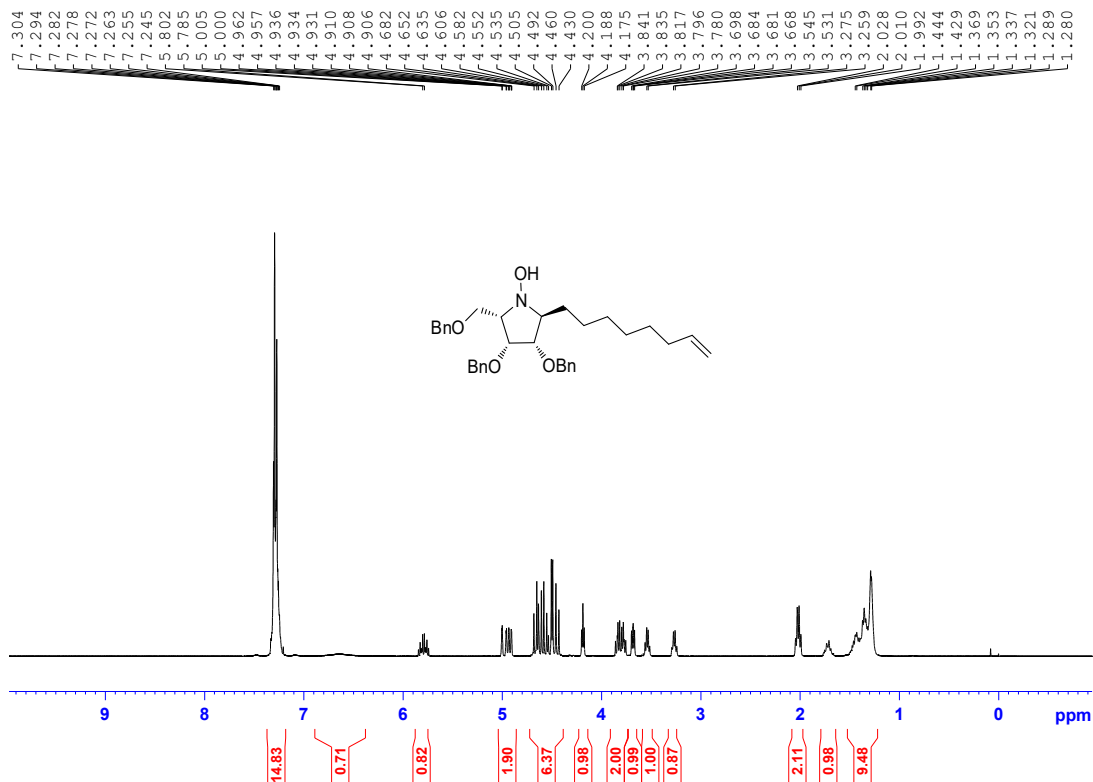

**Figure S17**

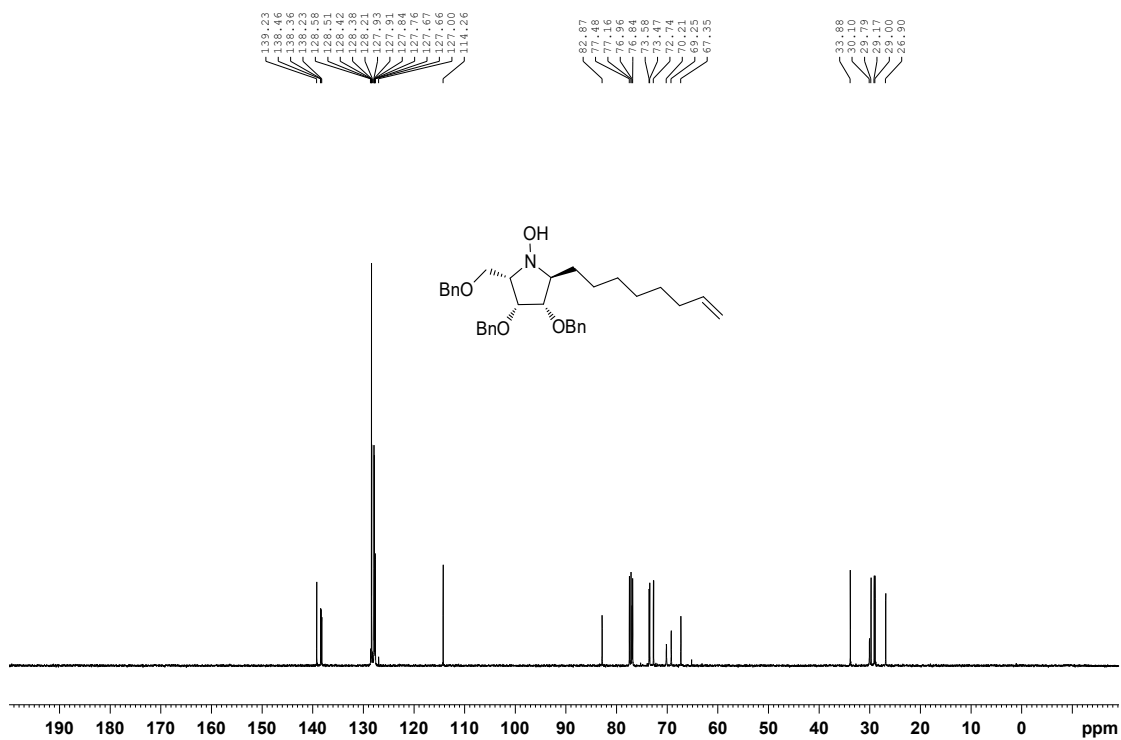

**Figure S18**



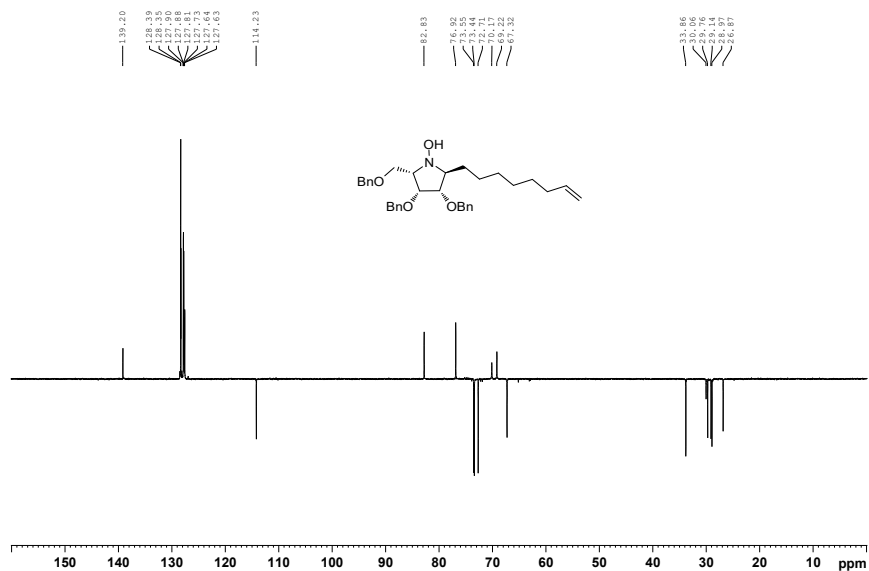

Figure S19

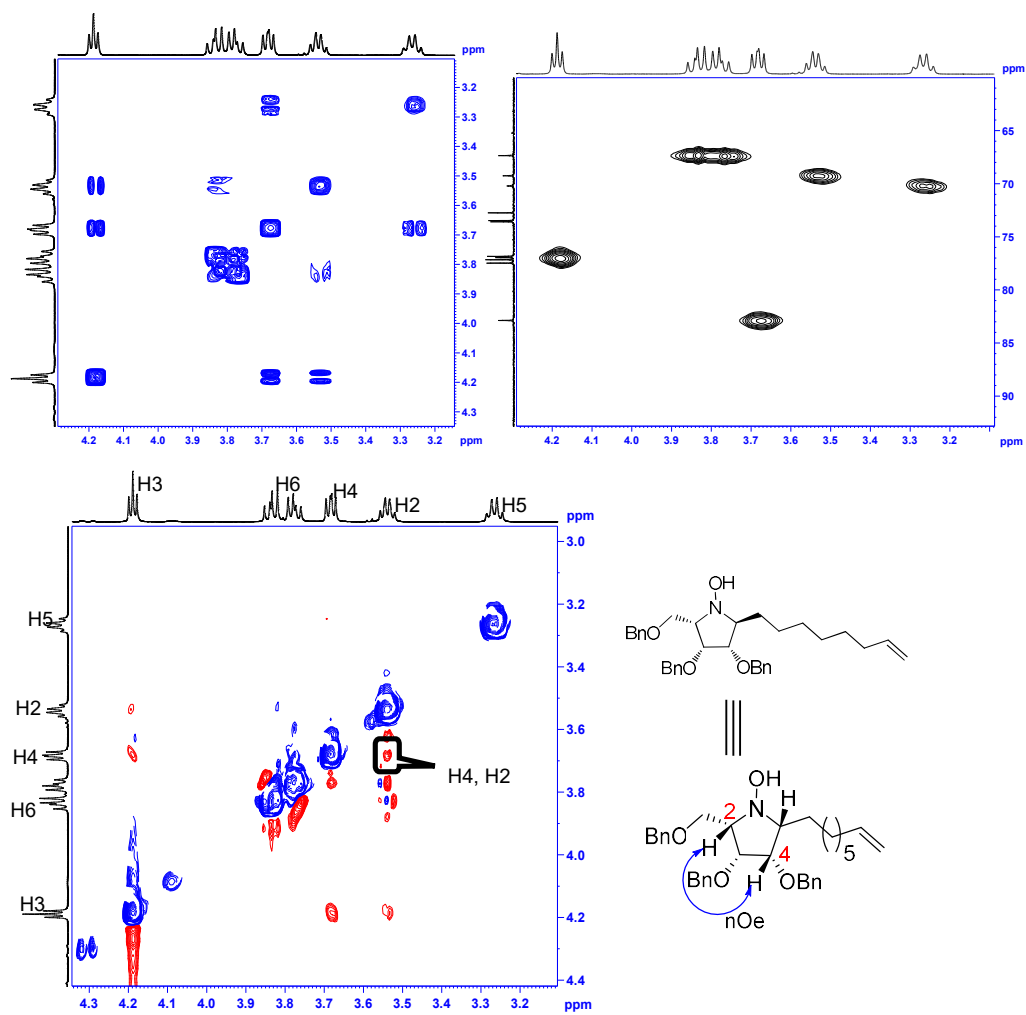

Figure S20

# Compound 2-*epi*-19

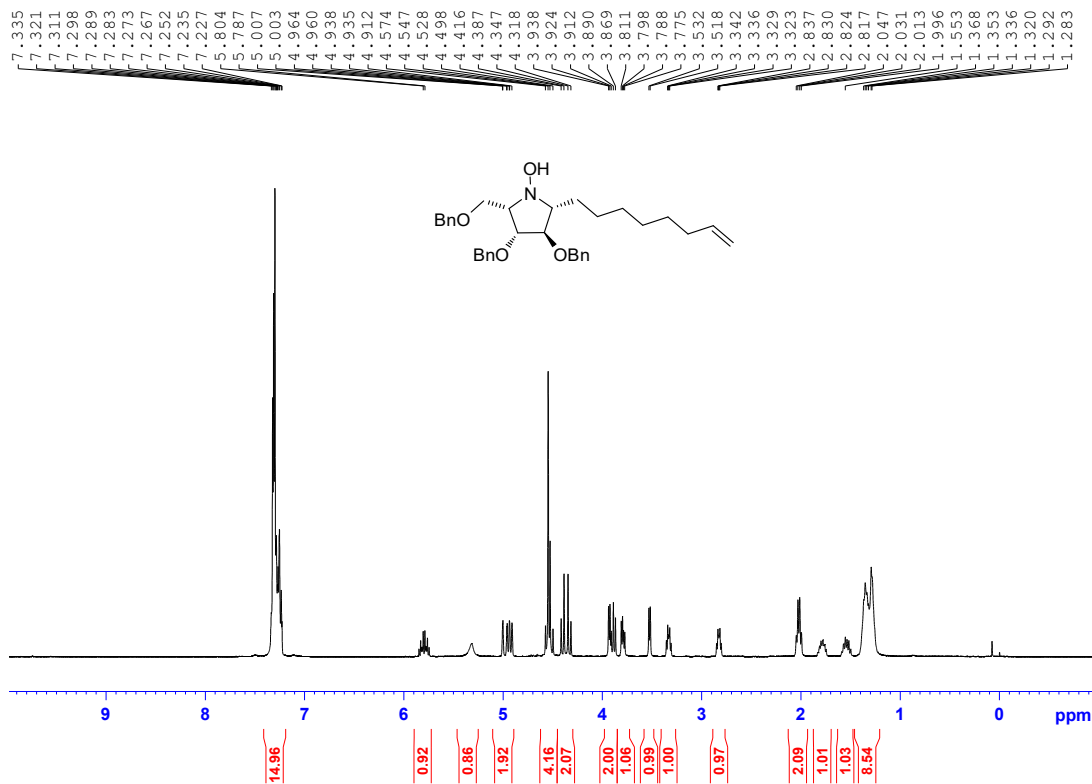

Figure S21

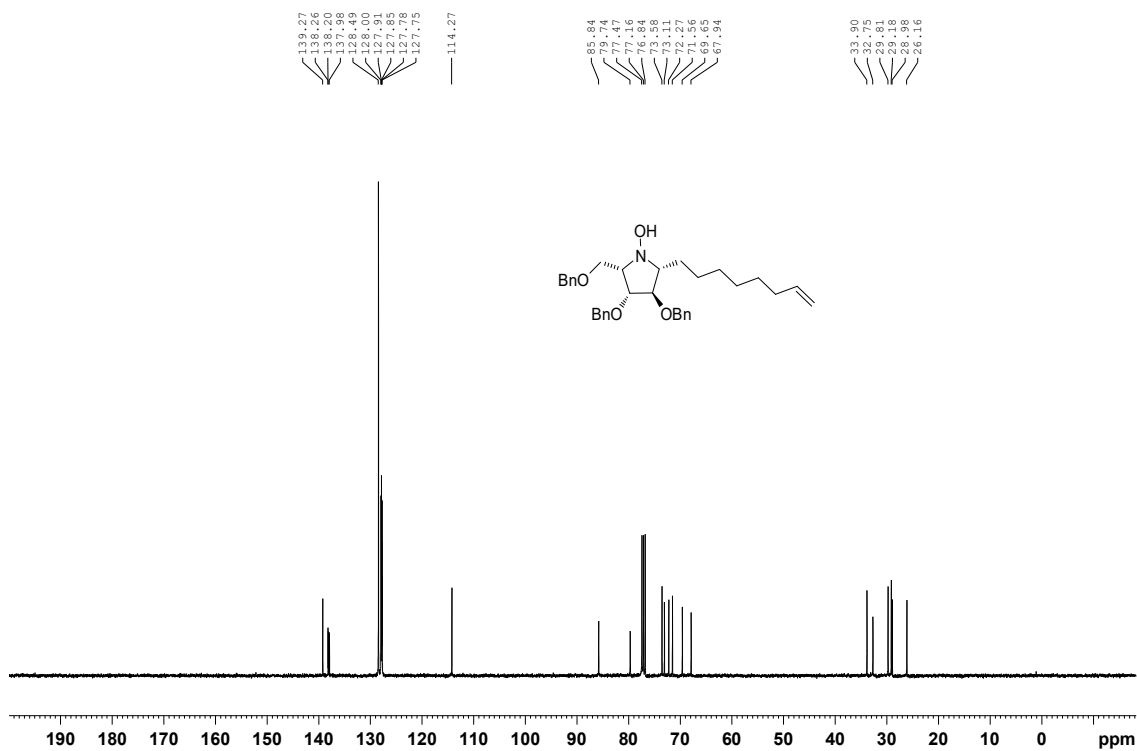

Figure S22

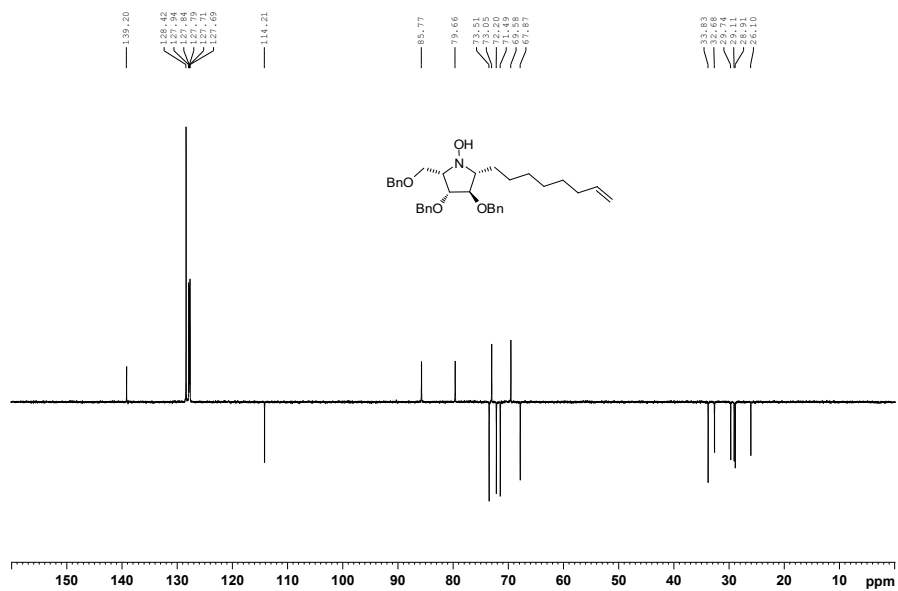

Figure S23

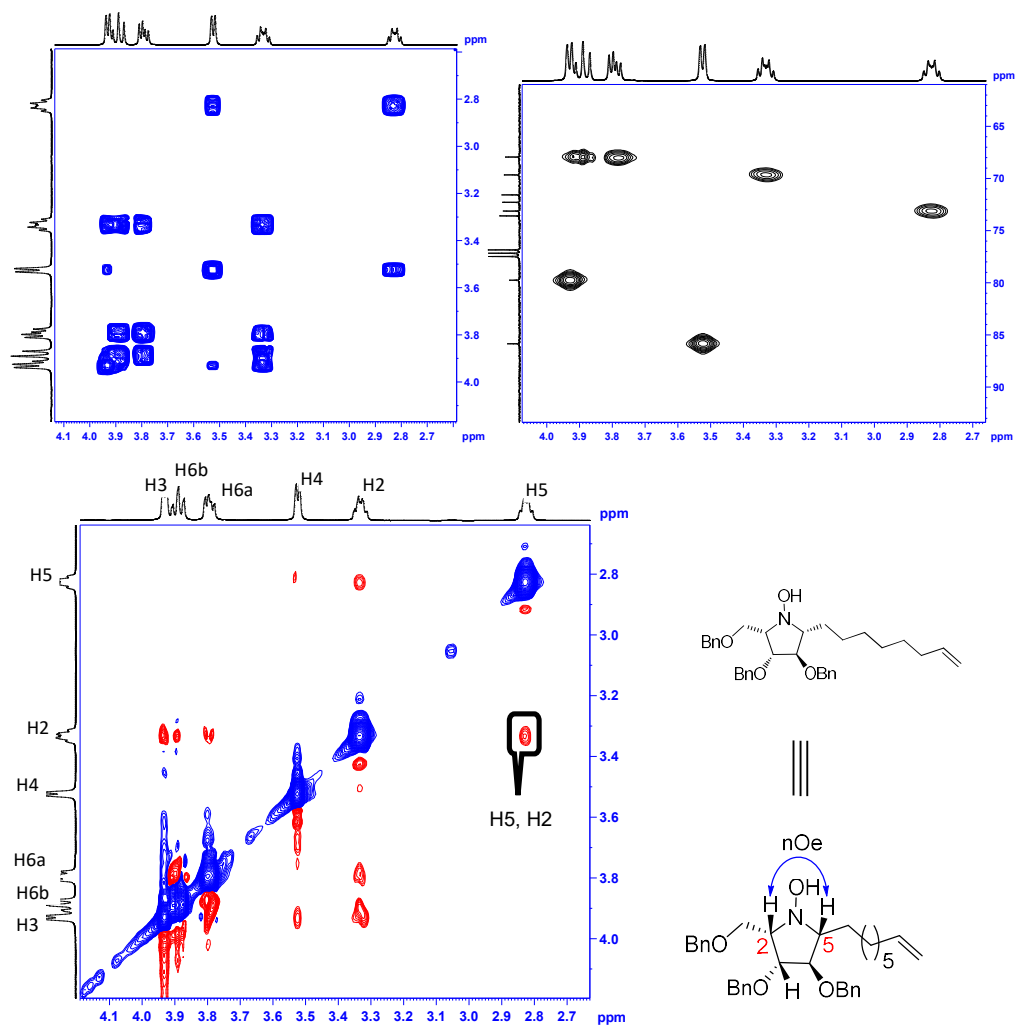

Figure S24

# Compound 13

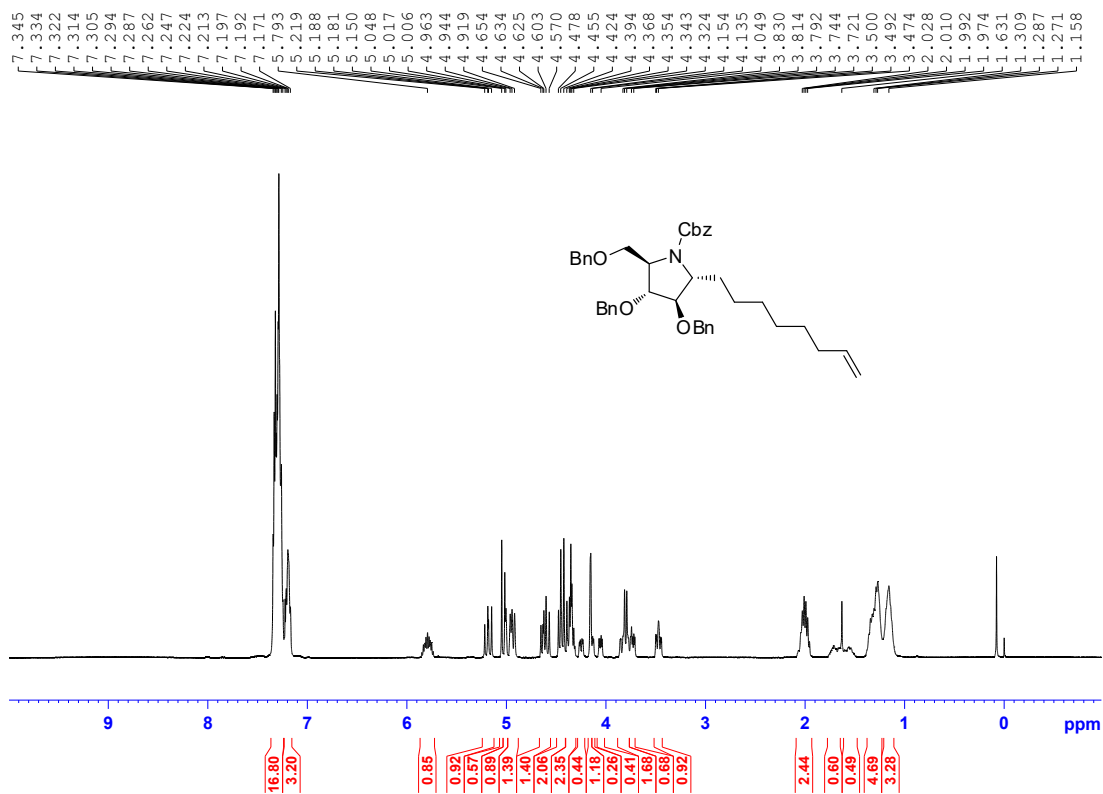

Figure S25

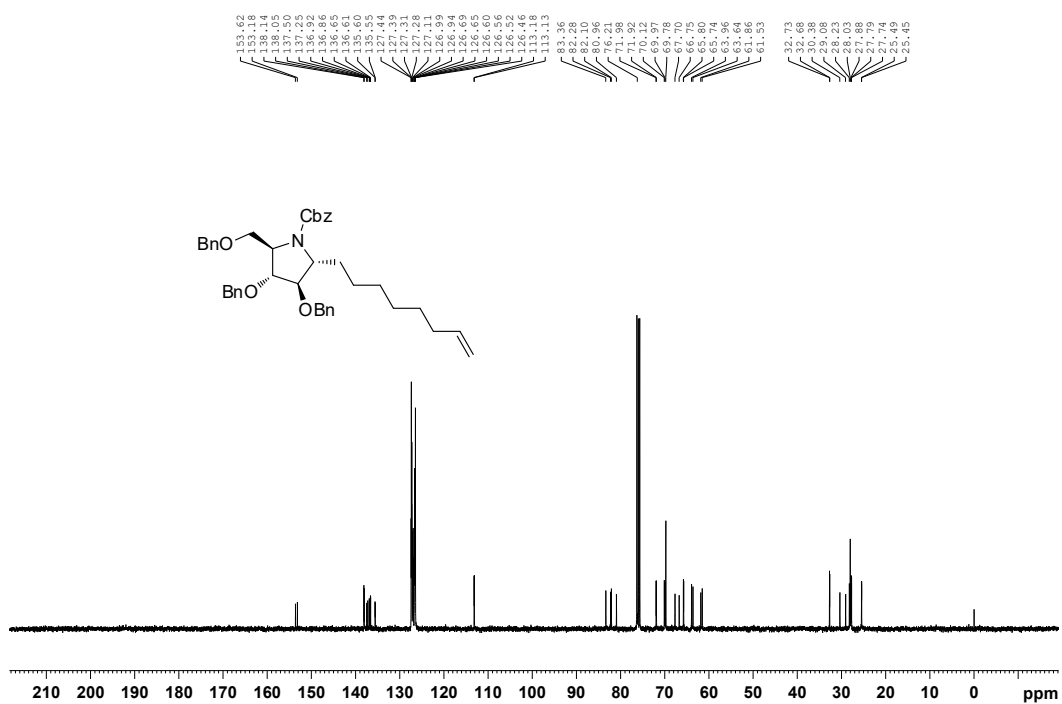

Figure S26

# Compound *ent*-13

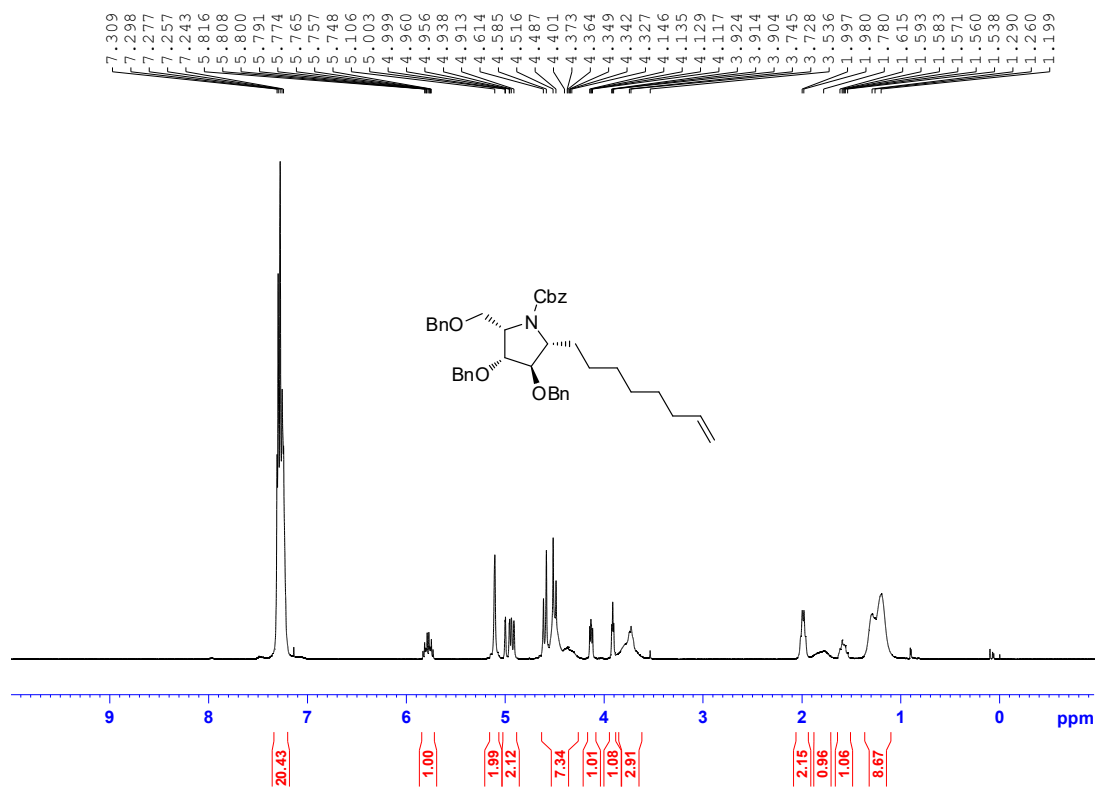

Figure S27

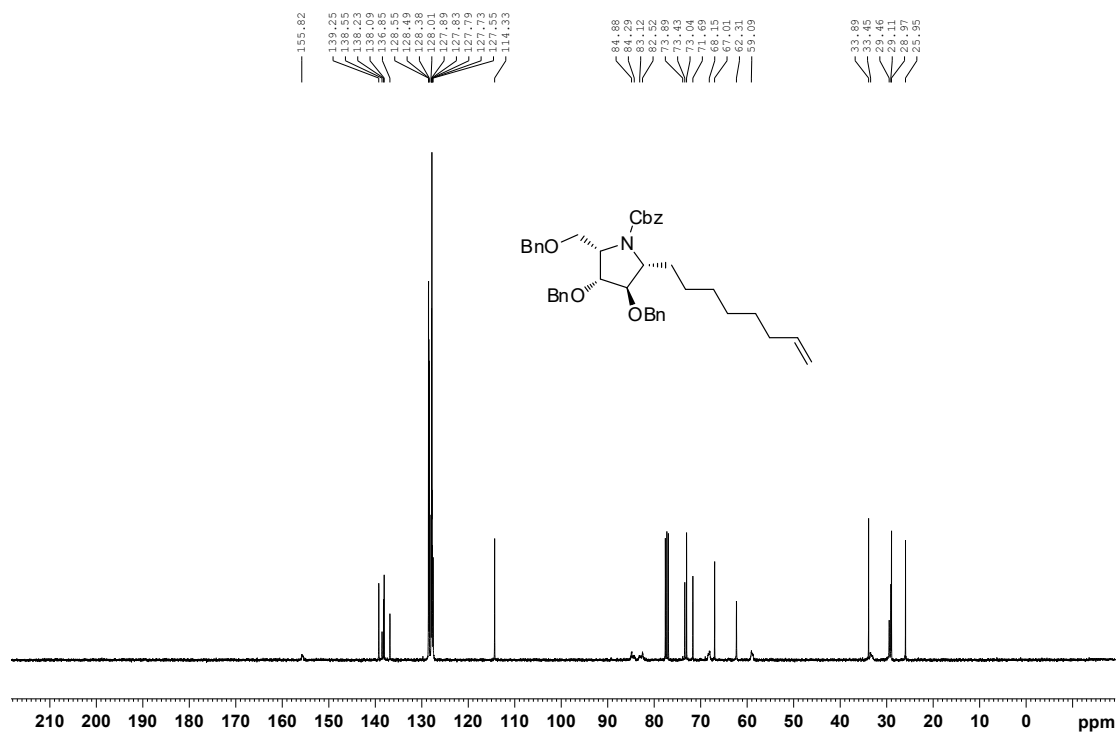

Figure S28

**Compound *ent-3-epi-13***

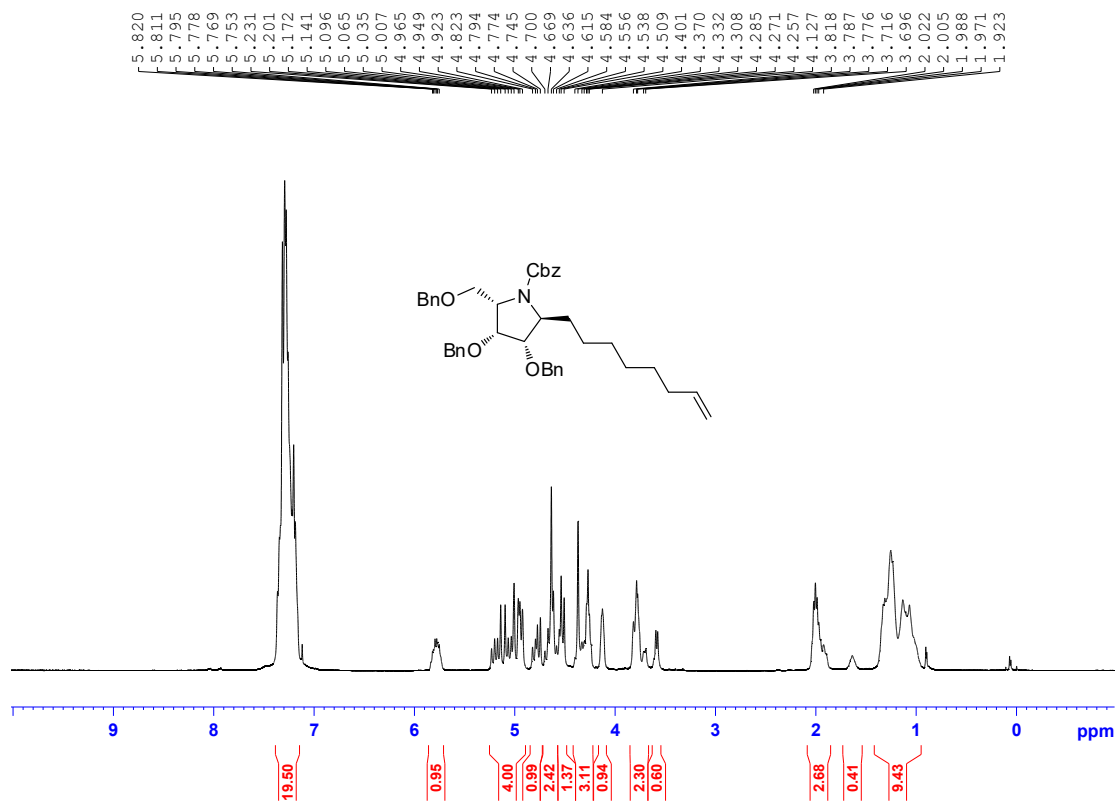

**Figure S29**

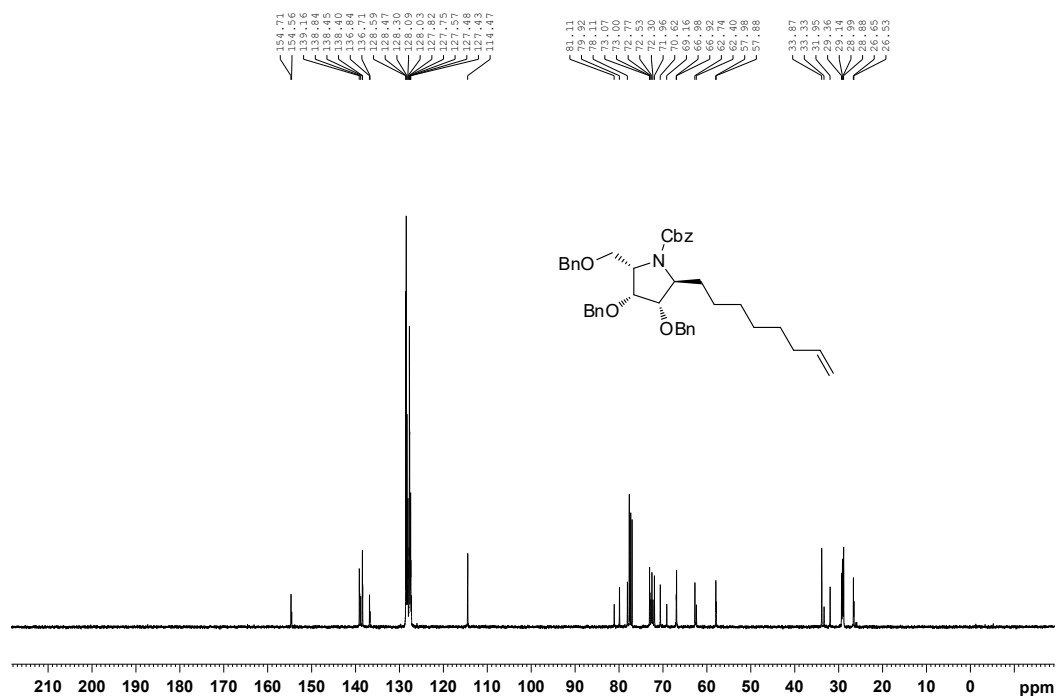

**Figure S30**

# Compound 2-*epi*-13

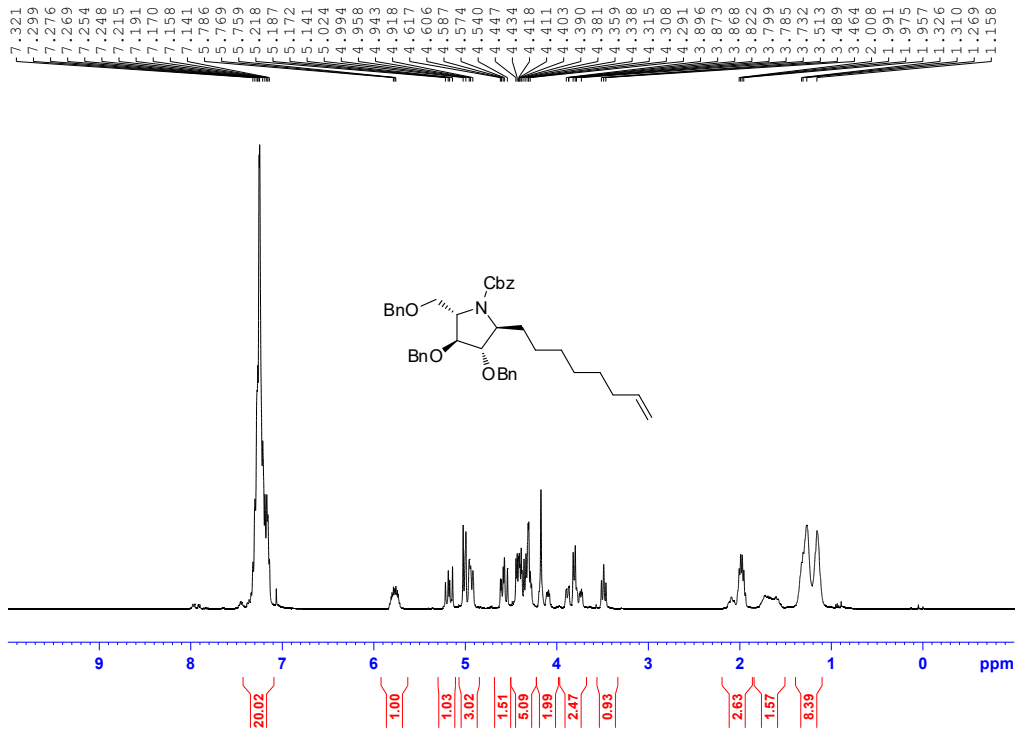

Figure S31

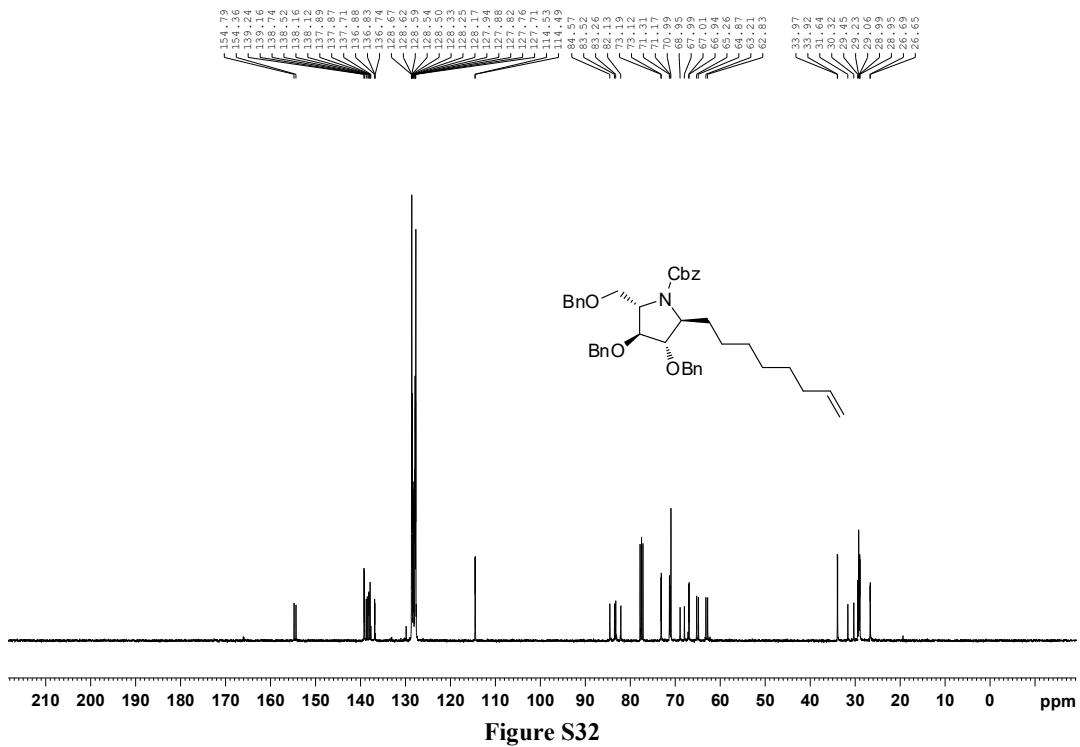

Figure S32

# Compound 12

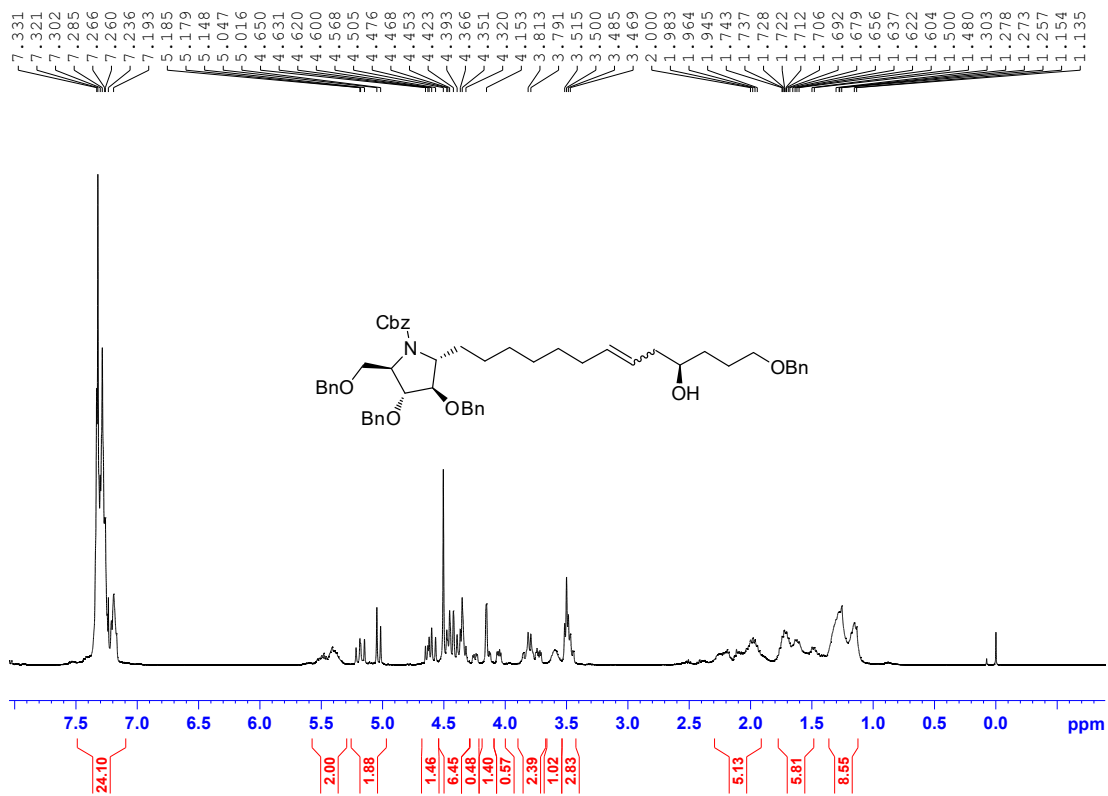

Figure S33

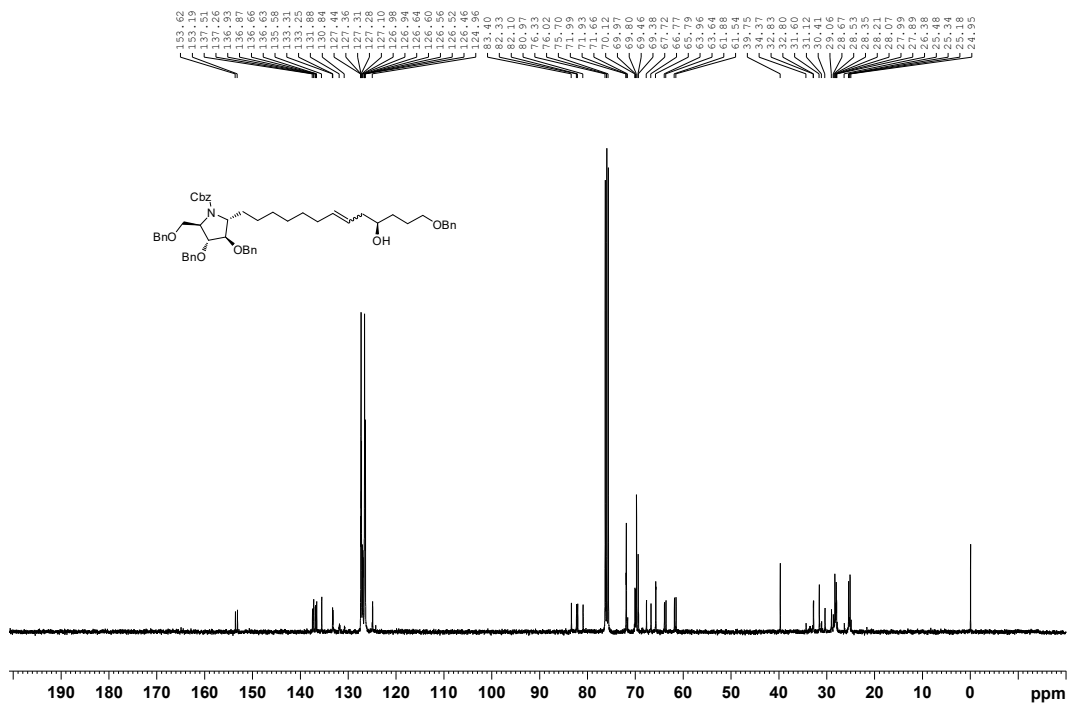

Figure S34





Compound *ent-10'-epi-12*

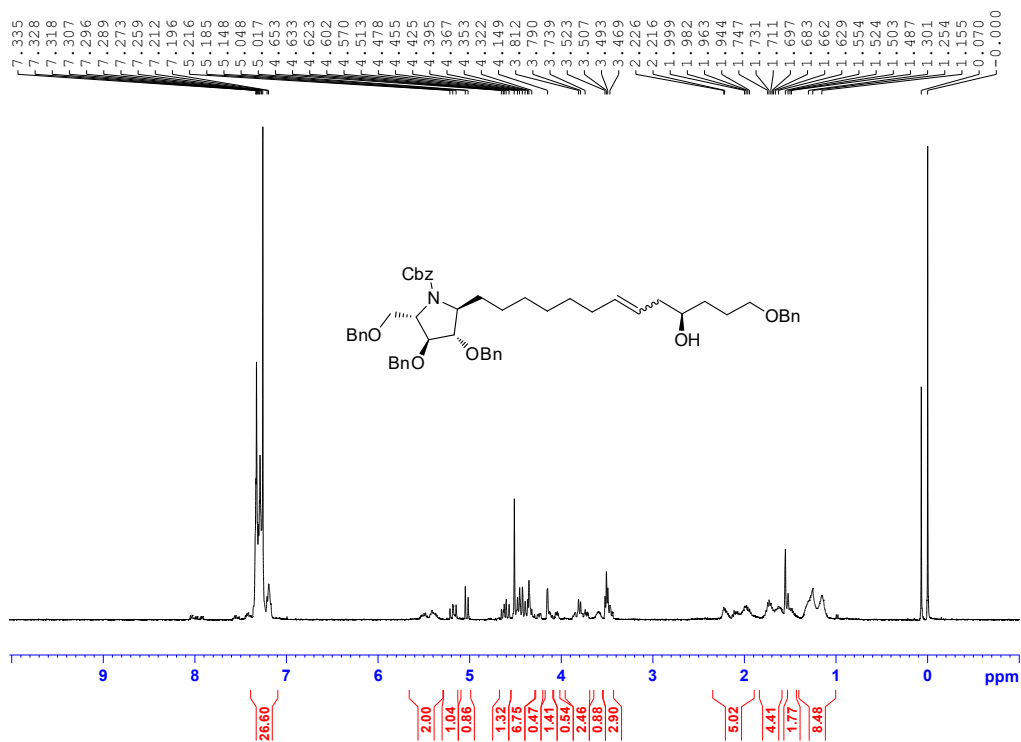

Figure S37

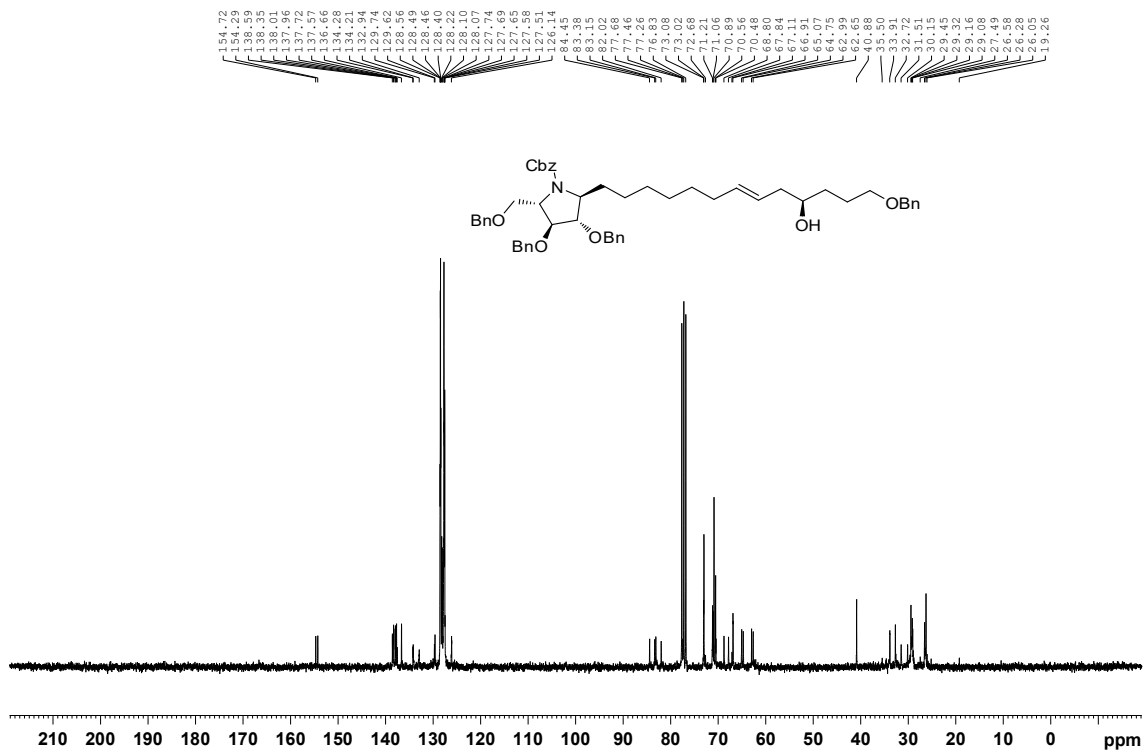

Figure S38

# Compound *ent-12*

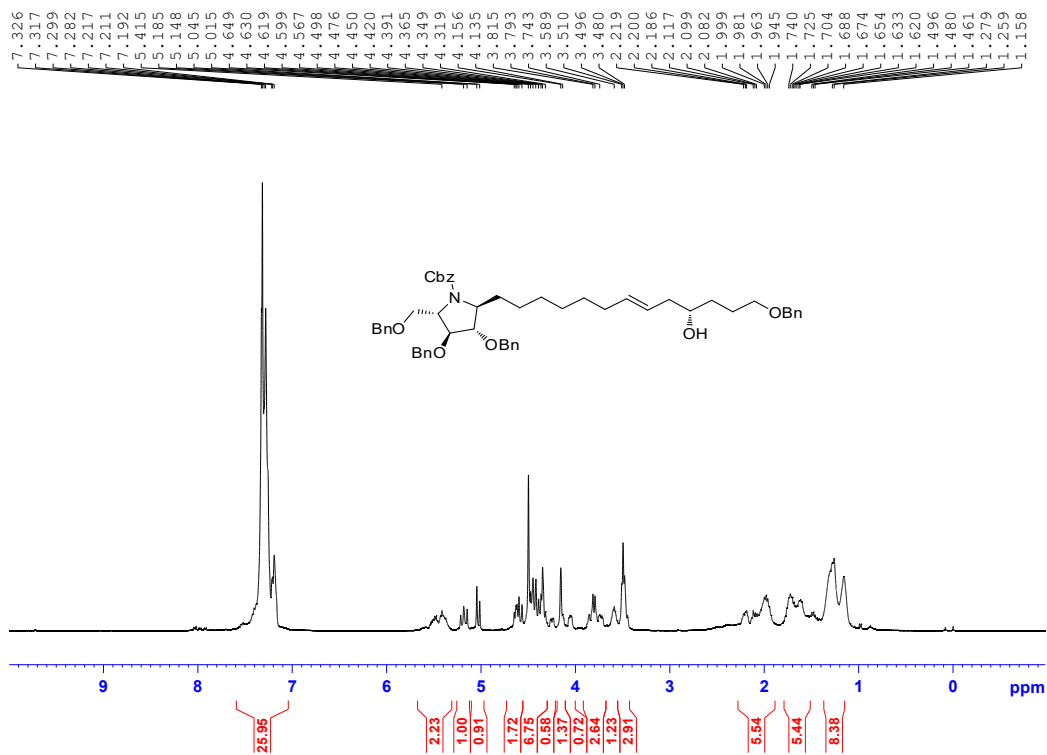

Figure S39

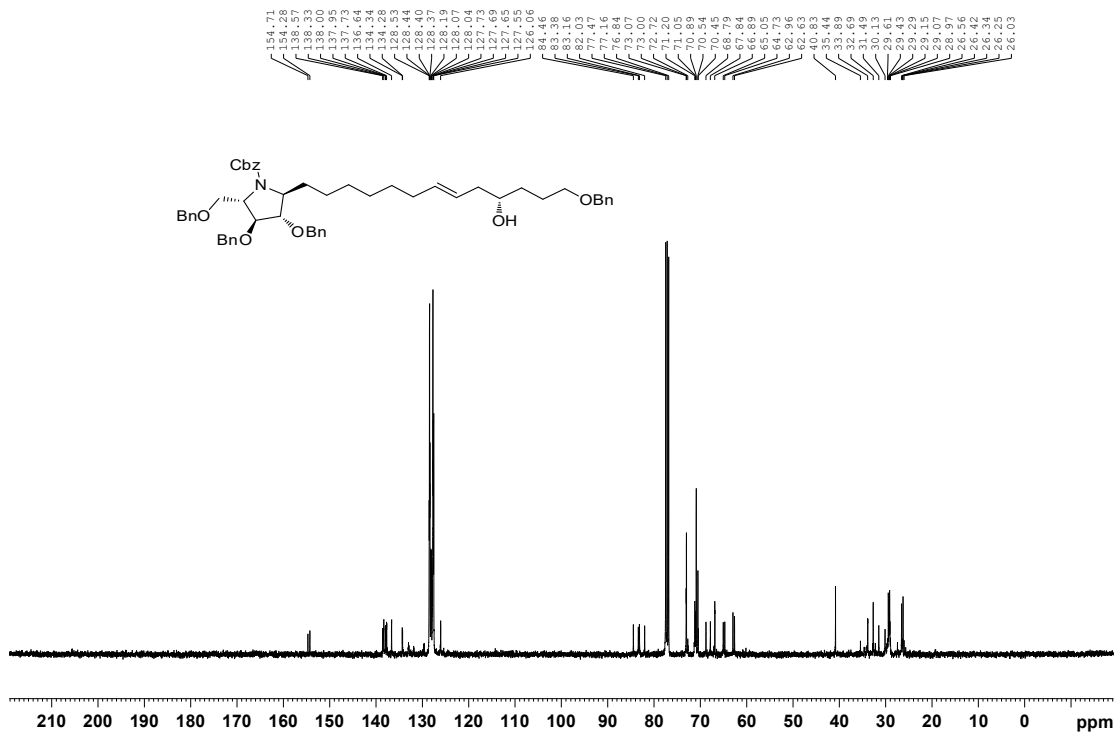

Figure S40



# Compound *ent-3-epi-12*

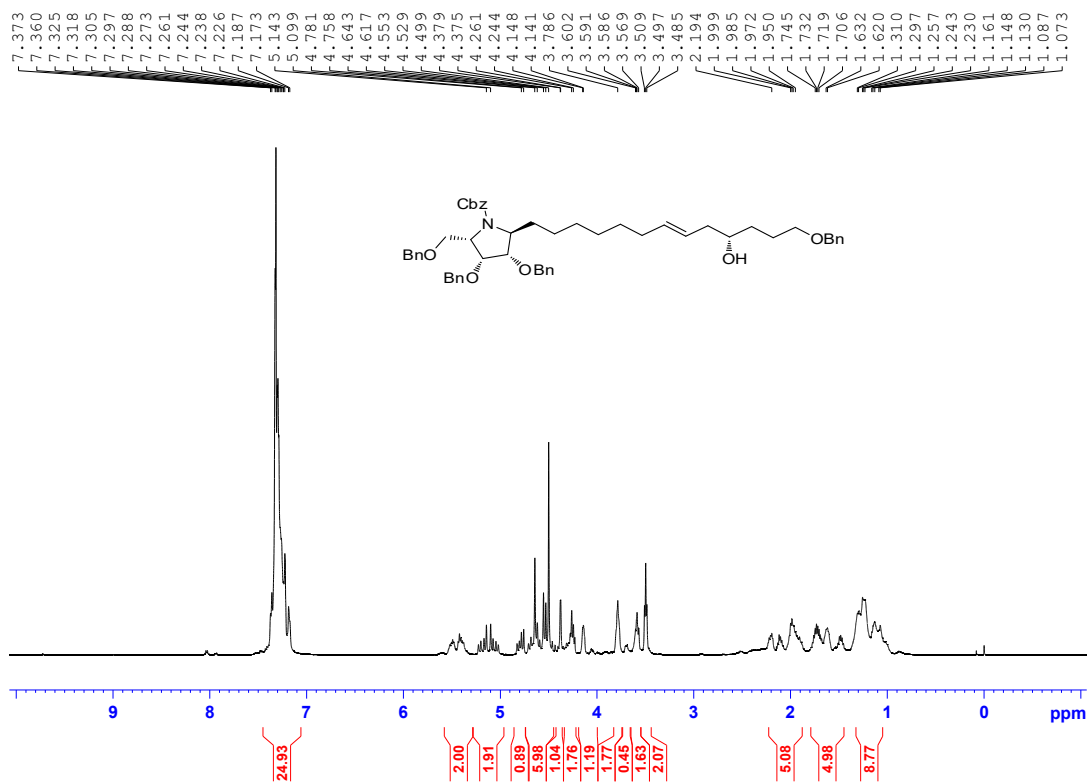

Figure S43

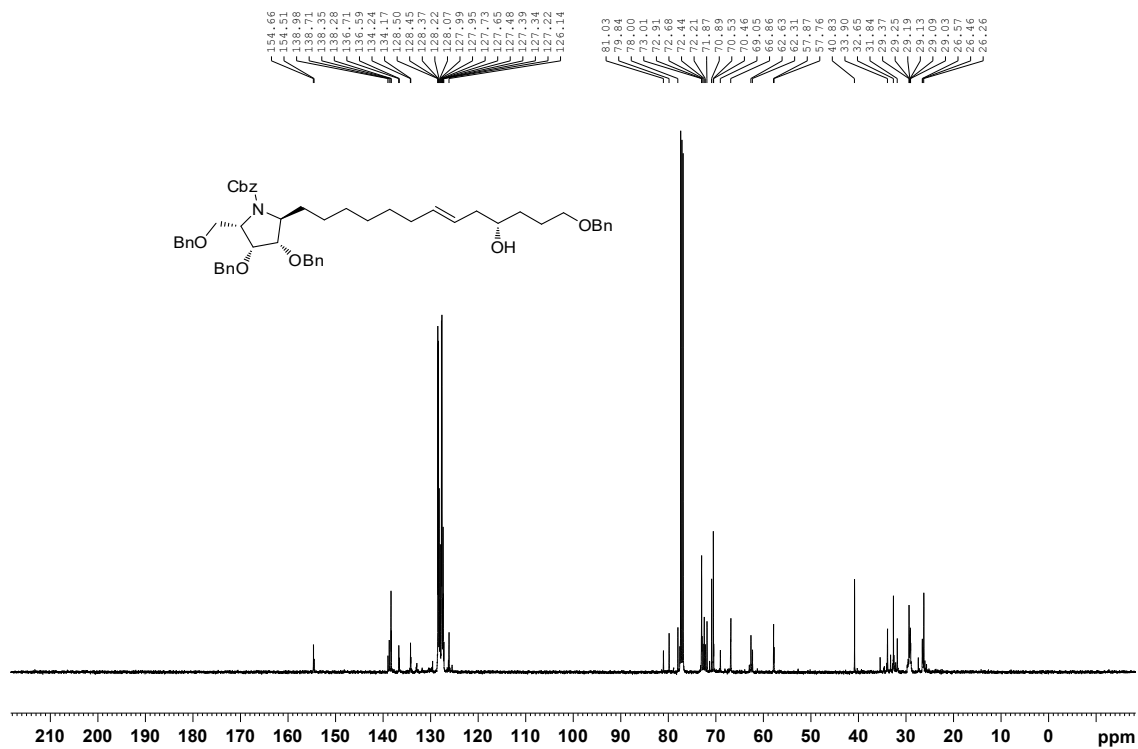

Figure S44

# Compound 2-*epi*-12

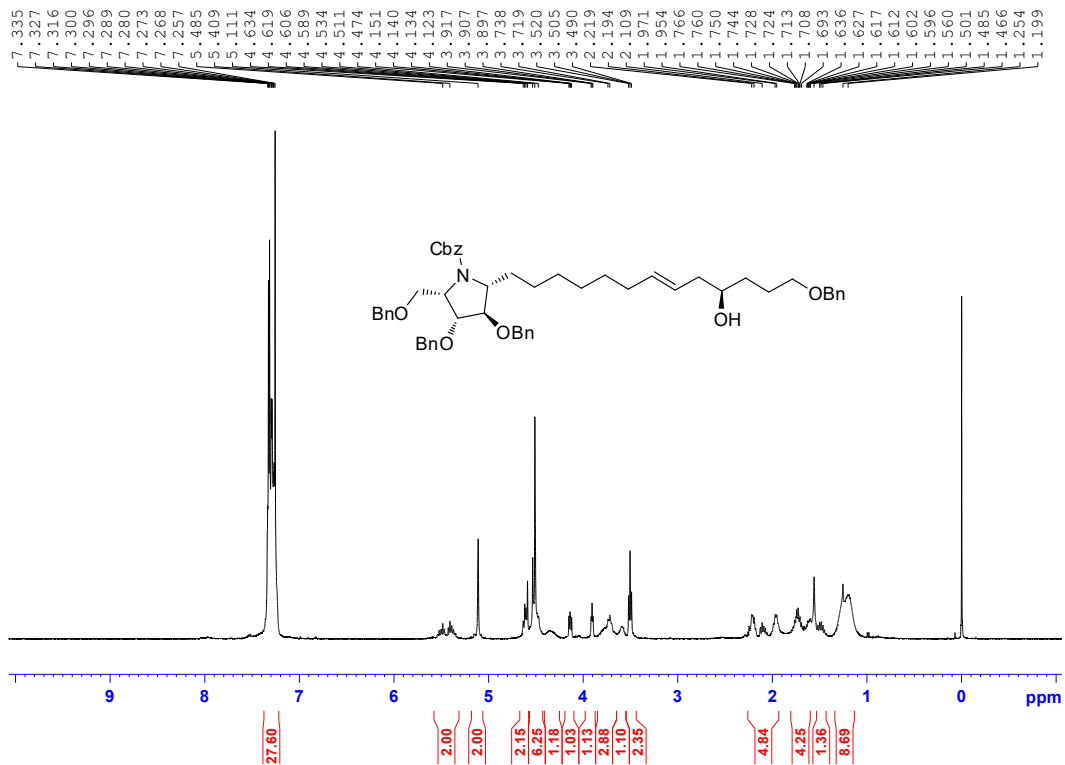

Figure S45

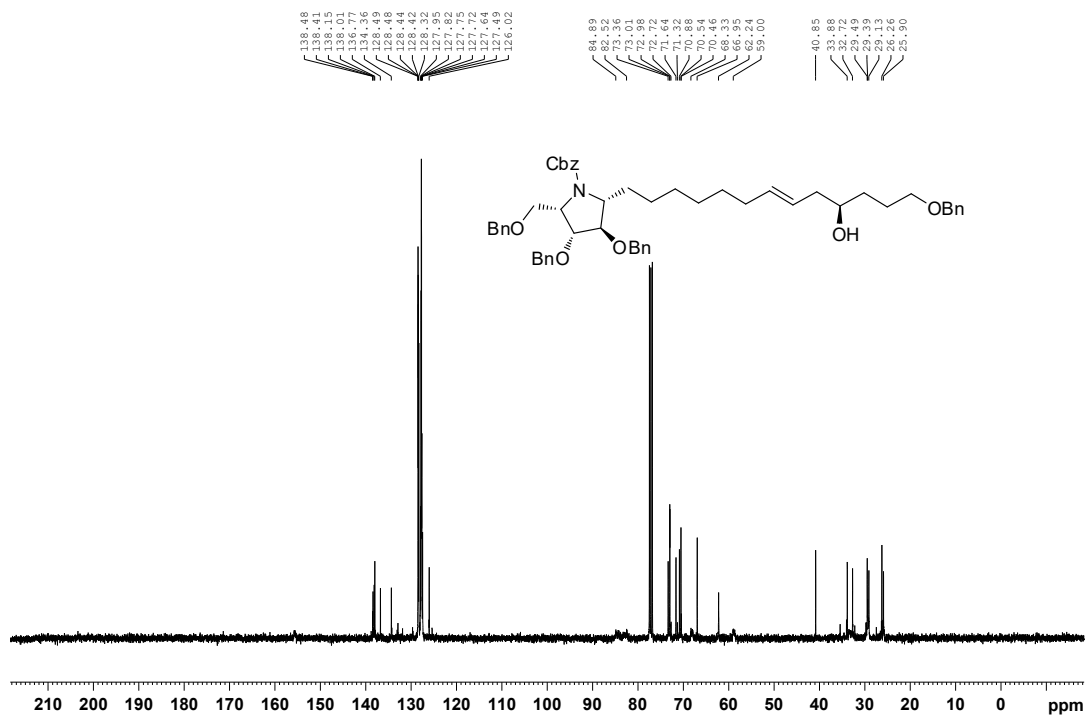

Figure S46



# Compound 3 (CD<sub>3</sub>OD)

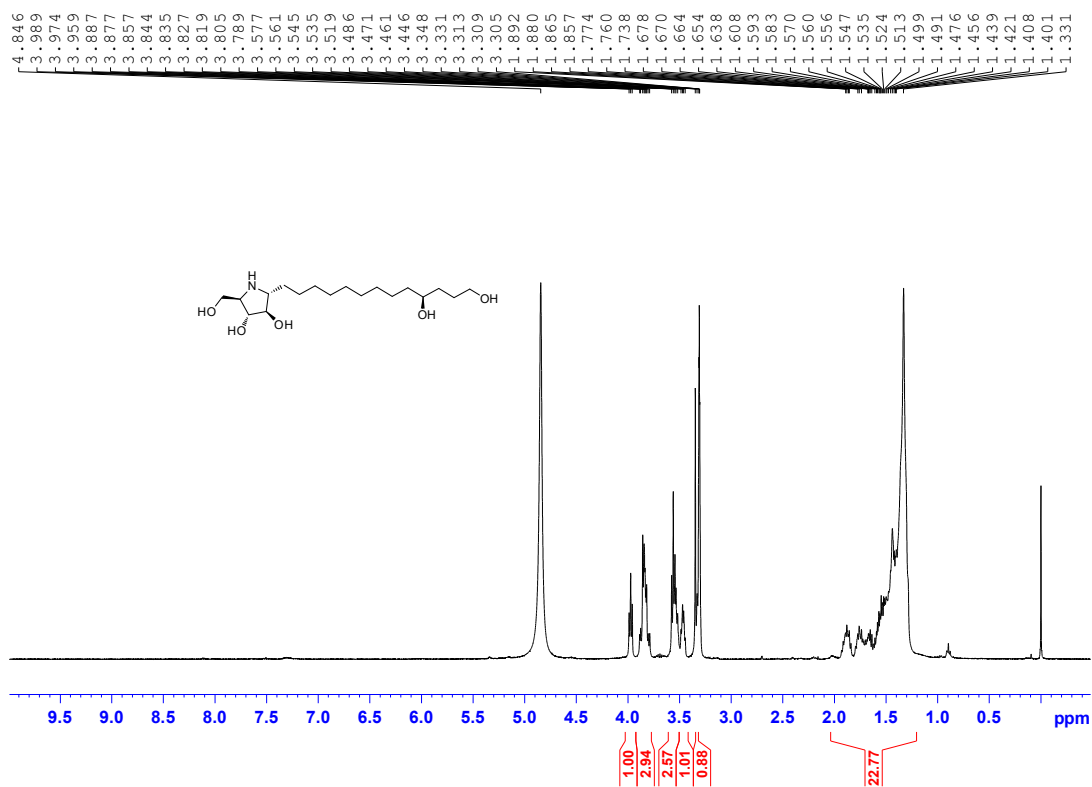

Figure S49

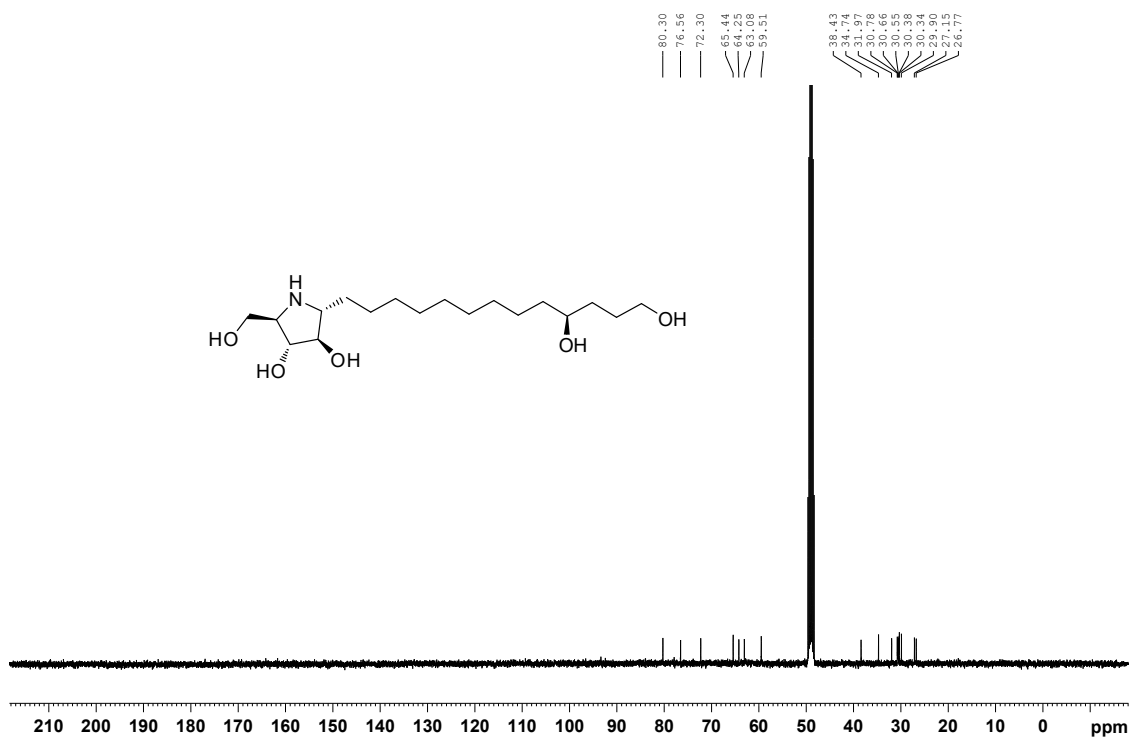

Figure S50



### Compound 3 (C<sub>5</sub>D<sub>5</sub>N)

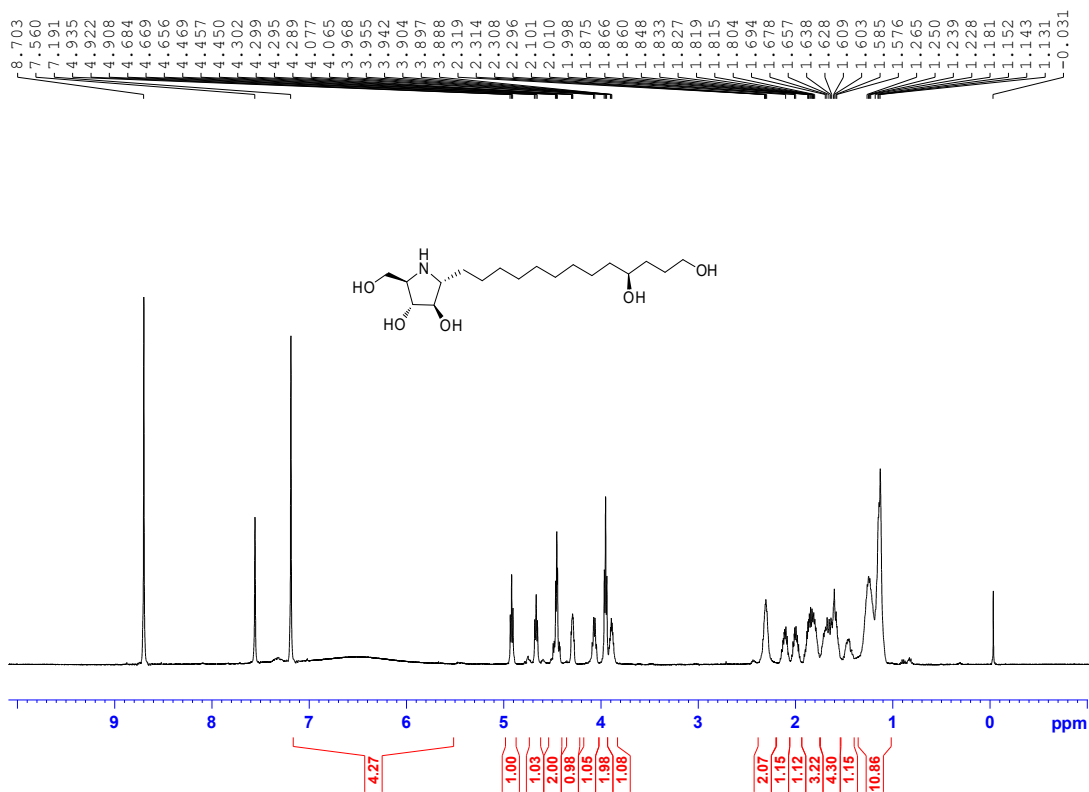

Figure S51

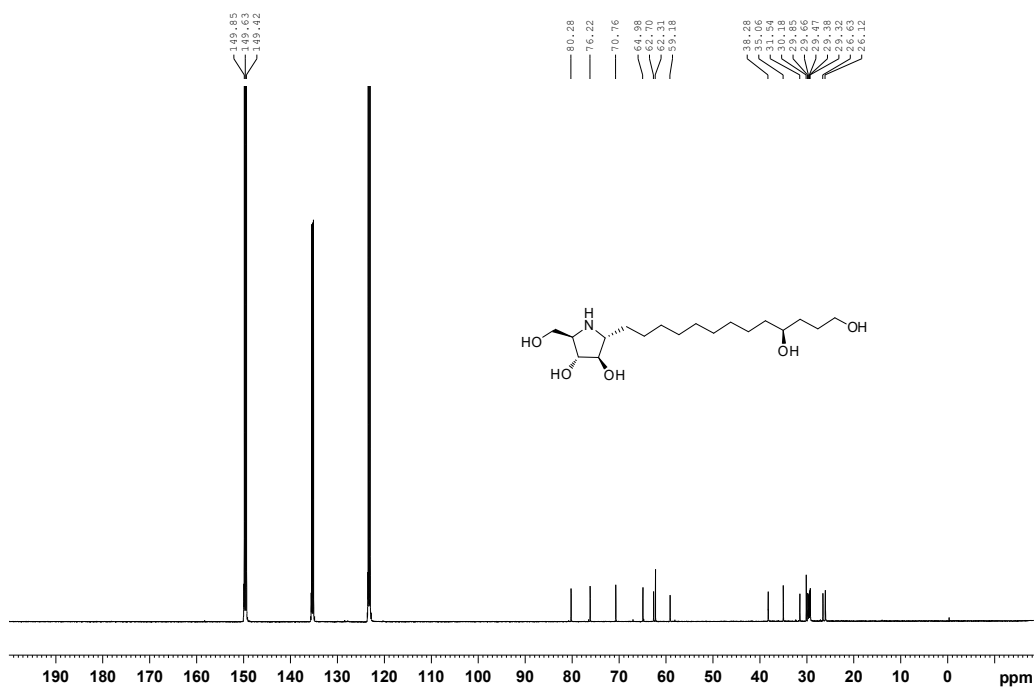

Figure S52

Compound 10'-*epi*-3

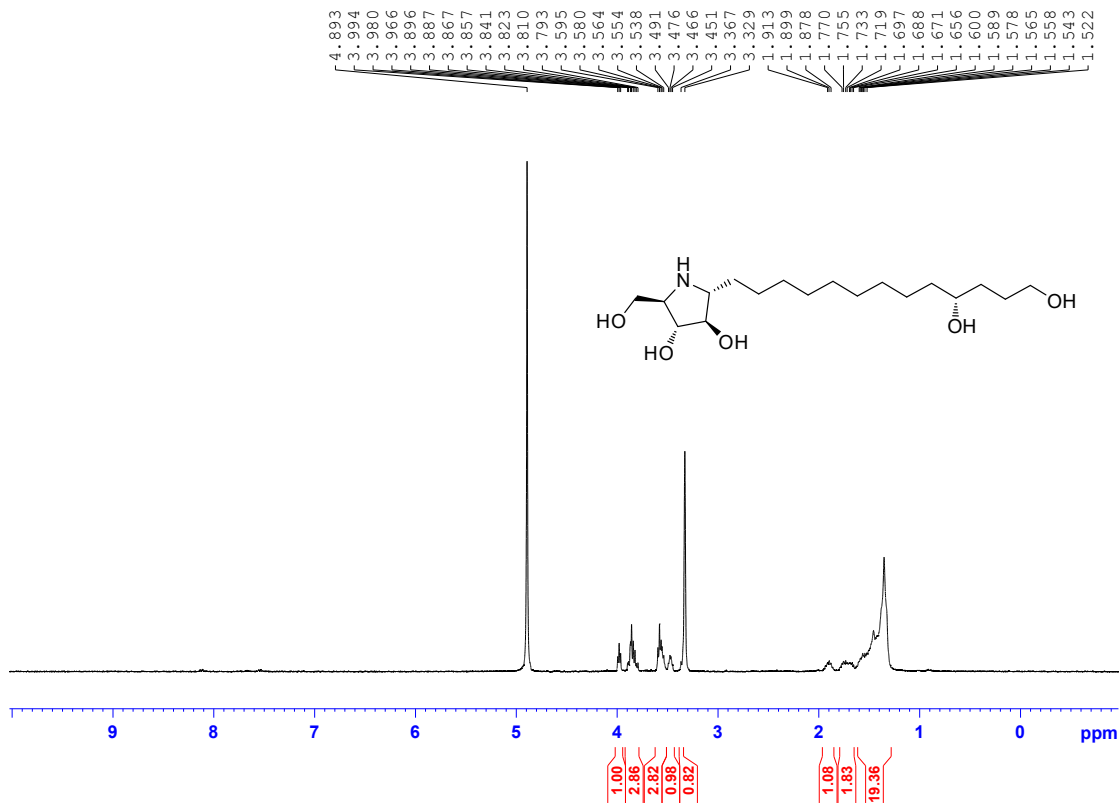

Figure S53

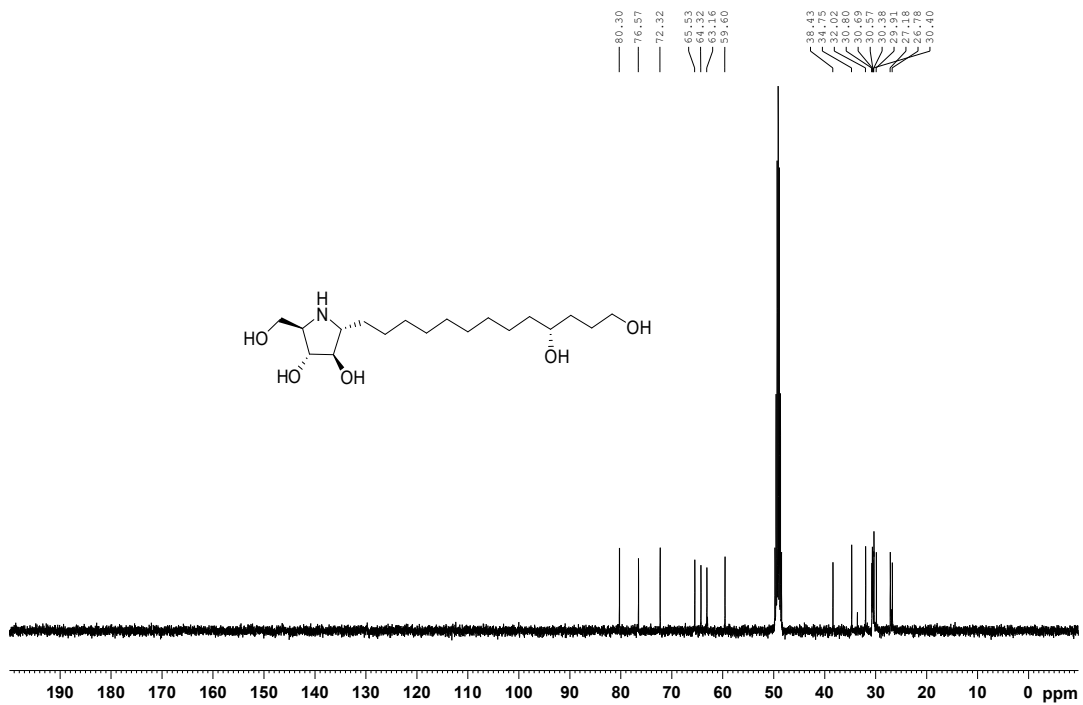

Figure S54

Compound *ent-10'-epi-3*

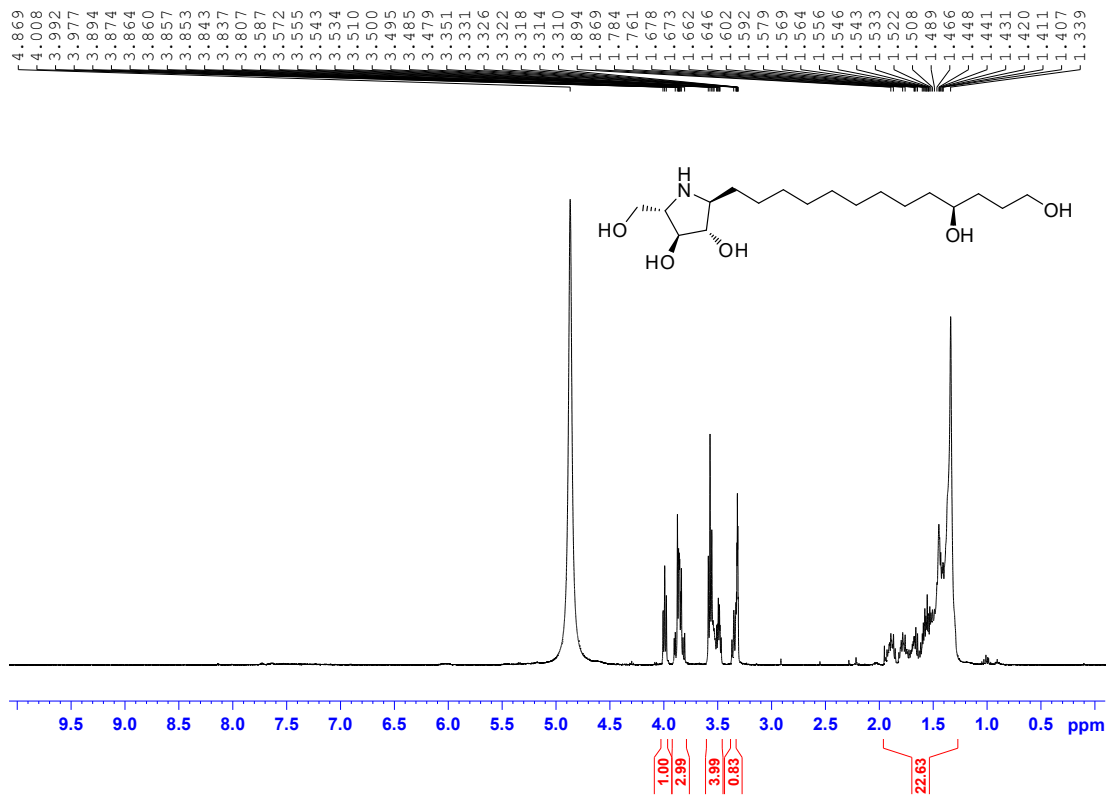

Figure S55

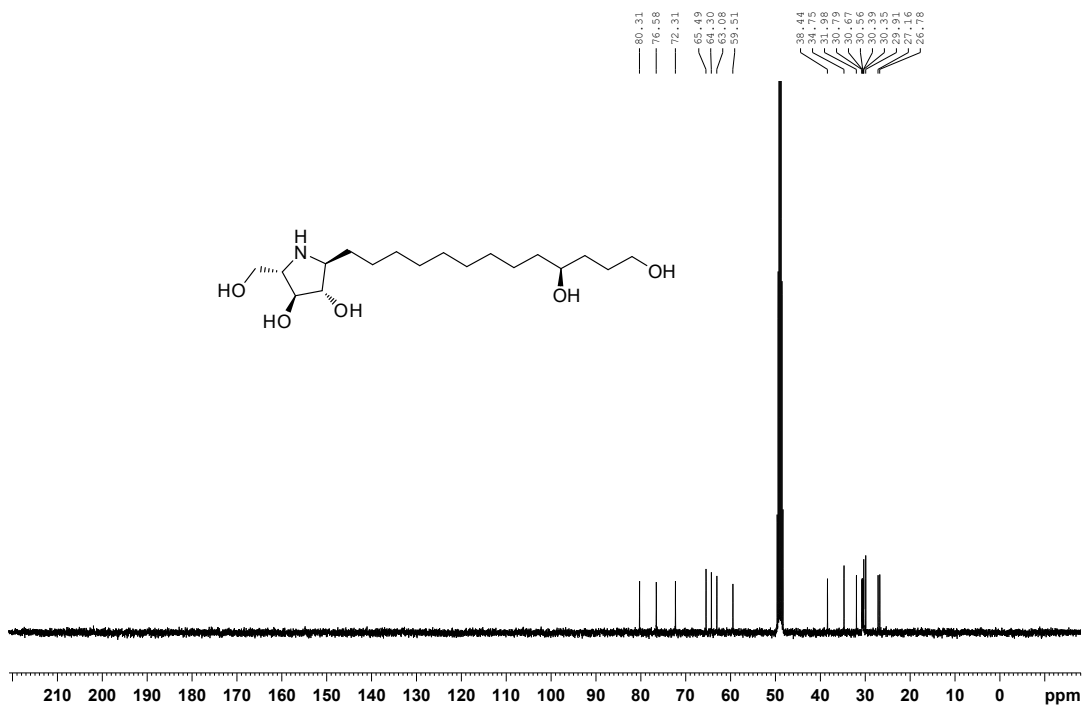

Figure S56

# Compound *ent-3*

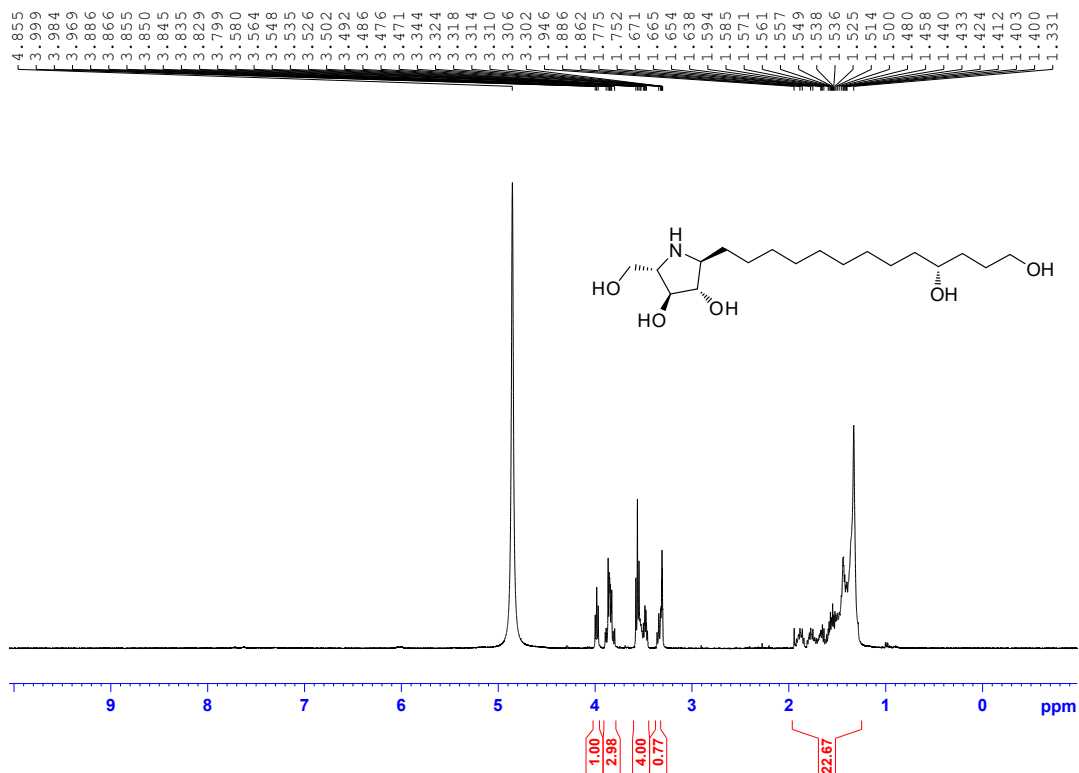

Figure S57

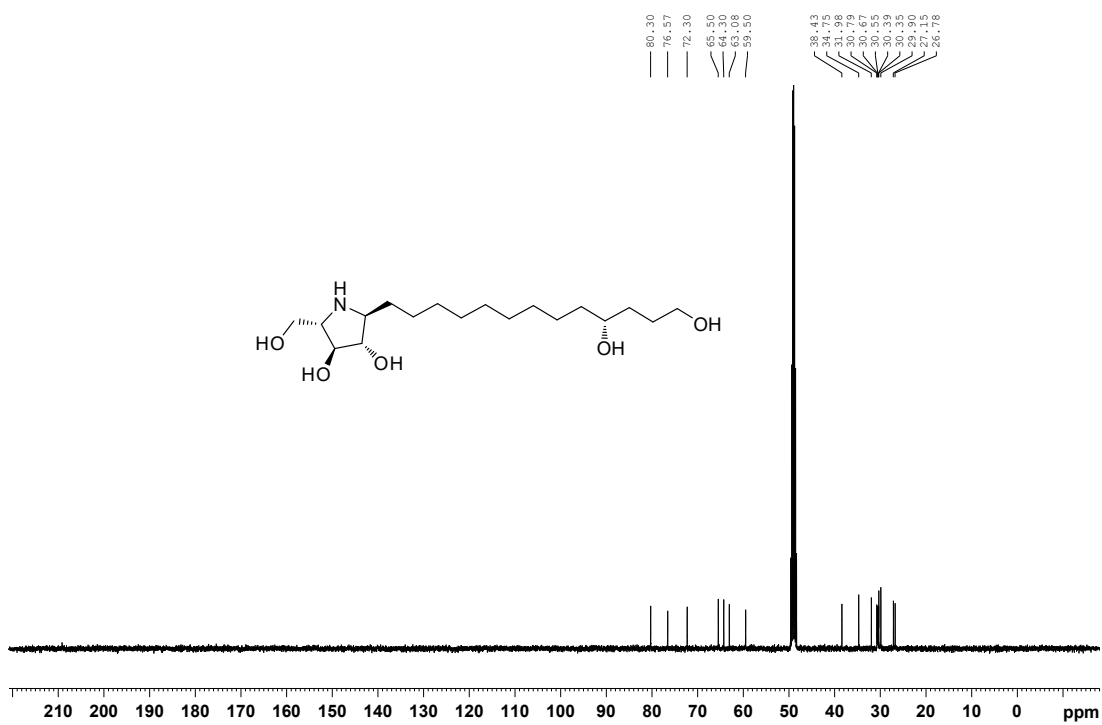

Figure S58

**Compound *ent*-3,10'-di-*epi*-3**

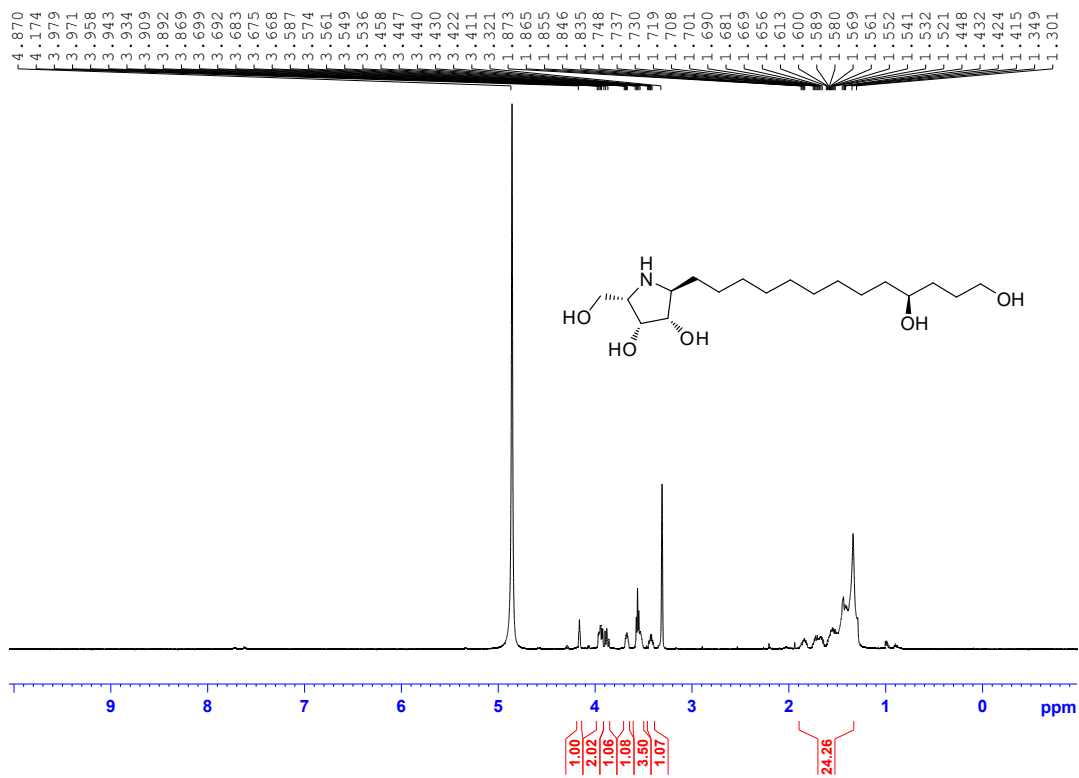

**Figure S59**

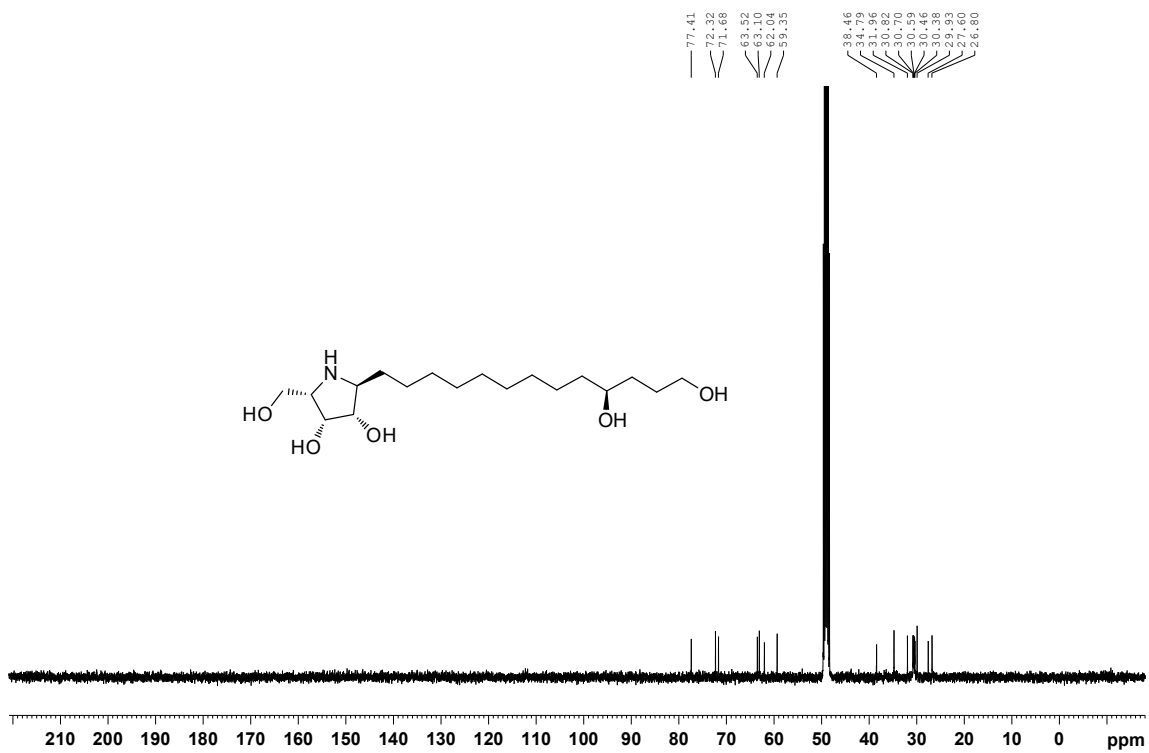

**Figure S60**

Compound *ent-3-epi-3*

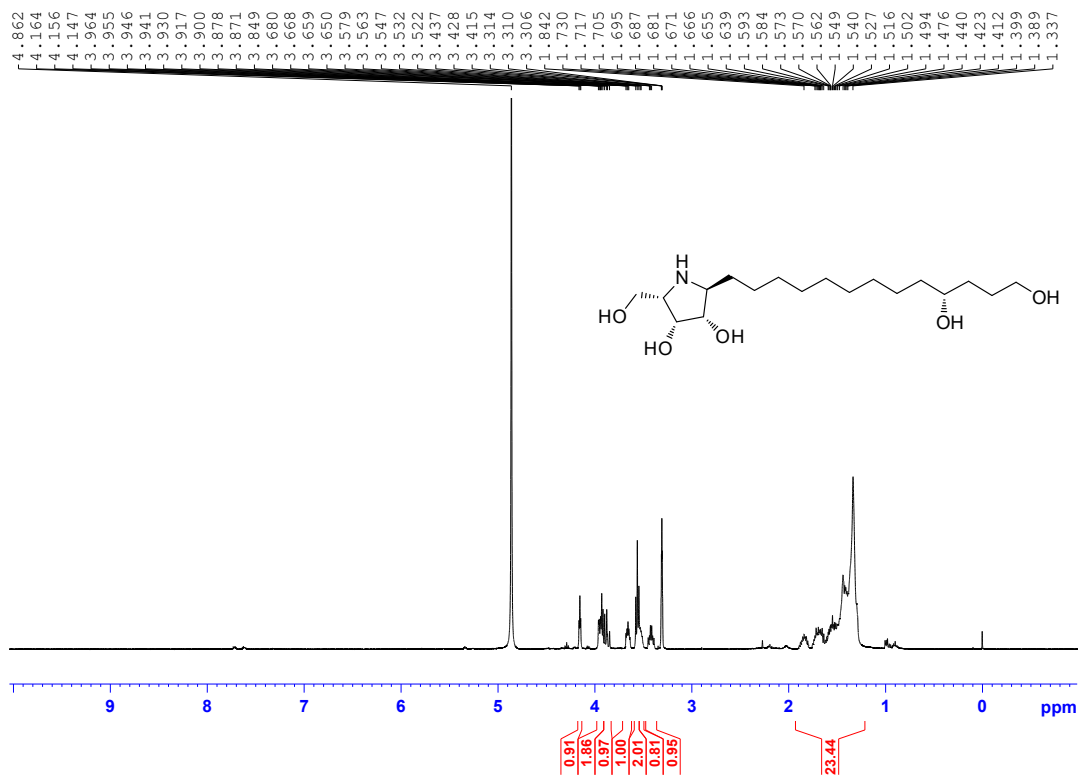

Figure S61

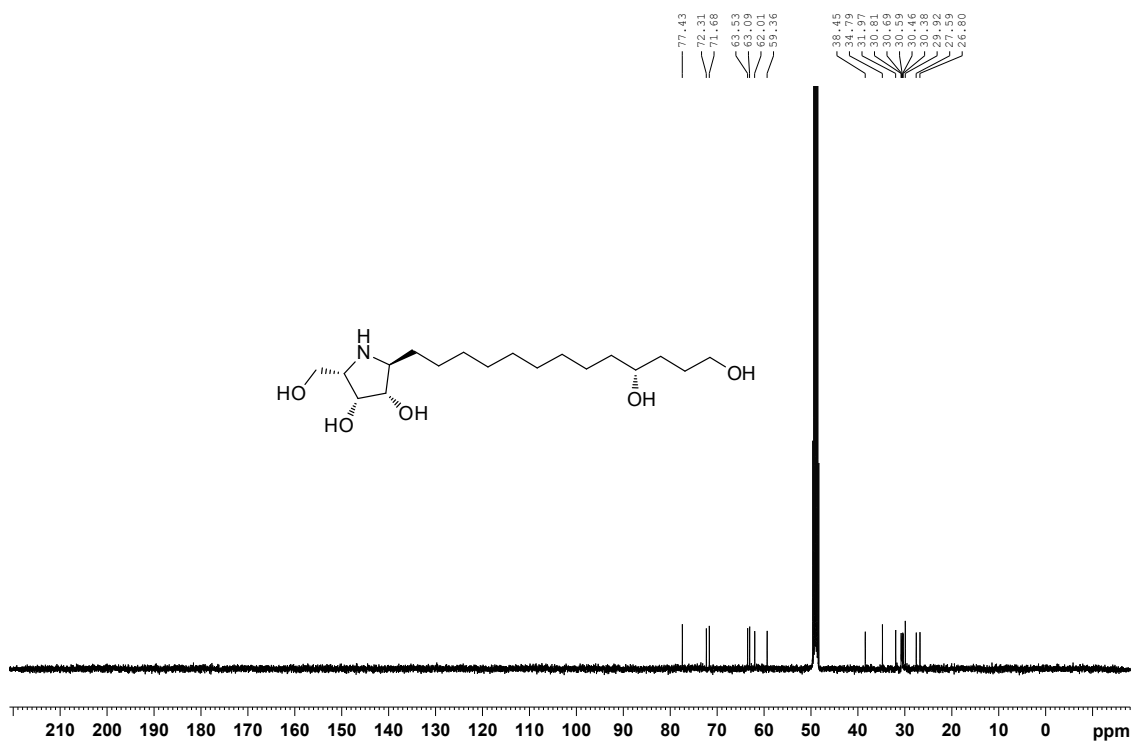

Figure S62

**Compound 2-*epi*-3**

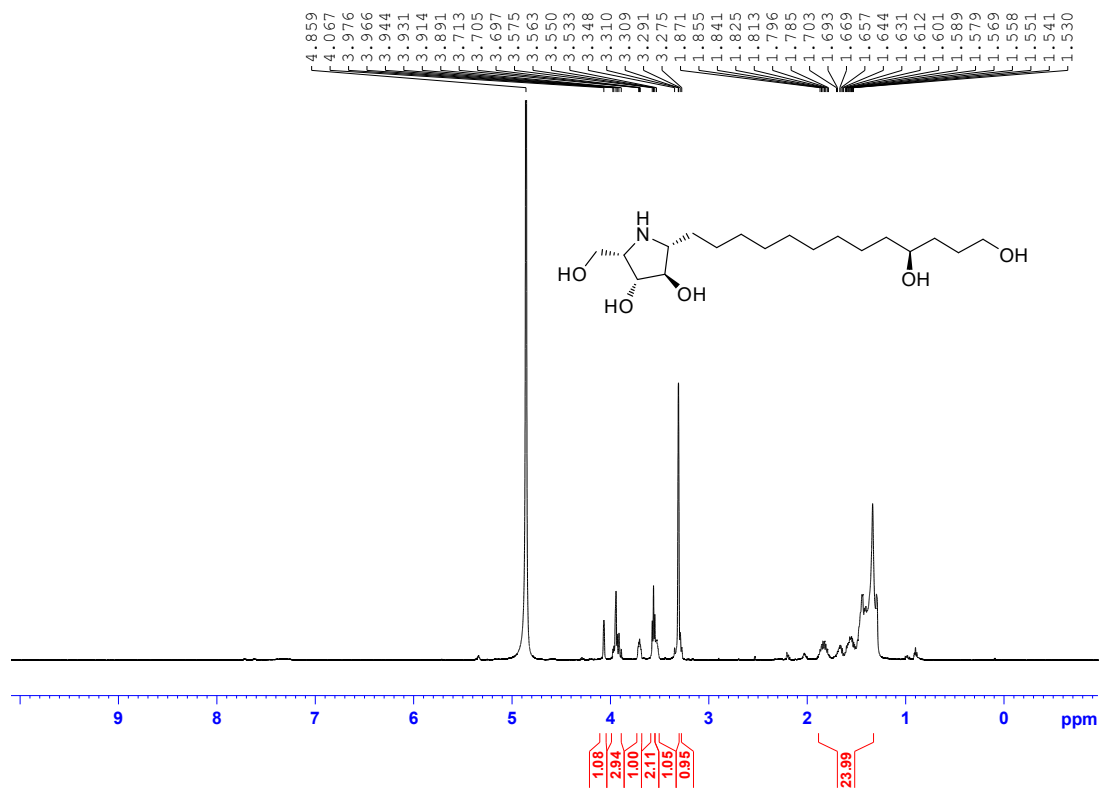

**Figure S63**

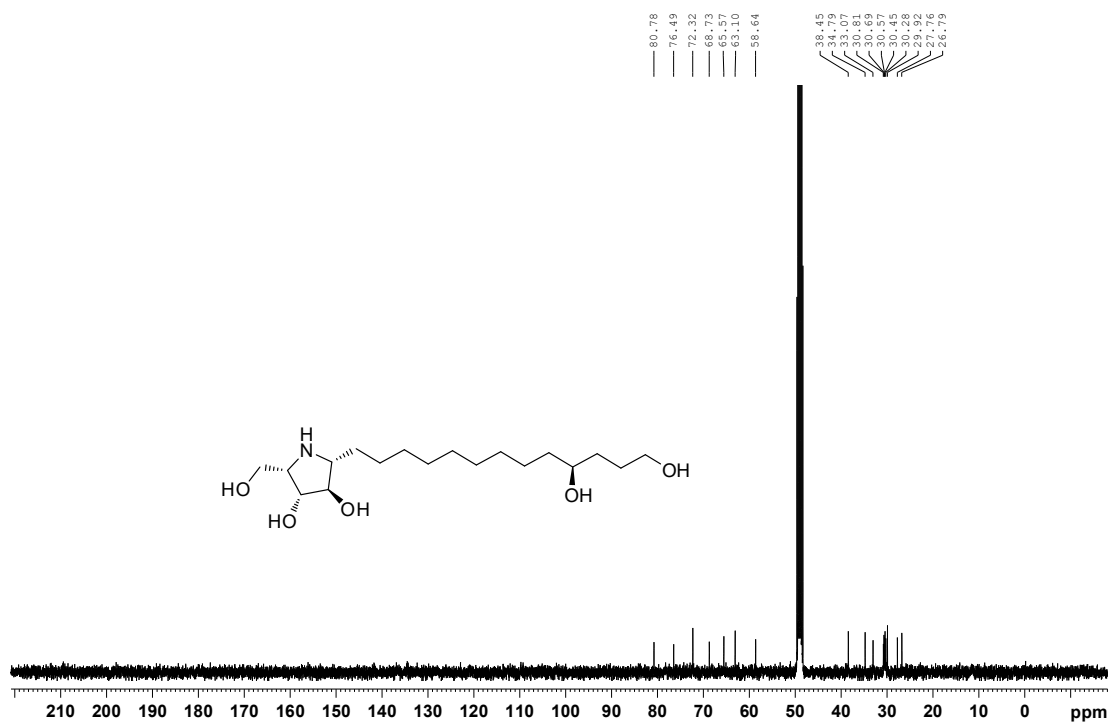

**Figure S64**

# Compound 2,10'-di-*epi*-3

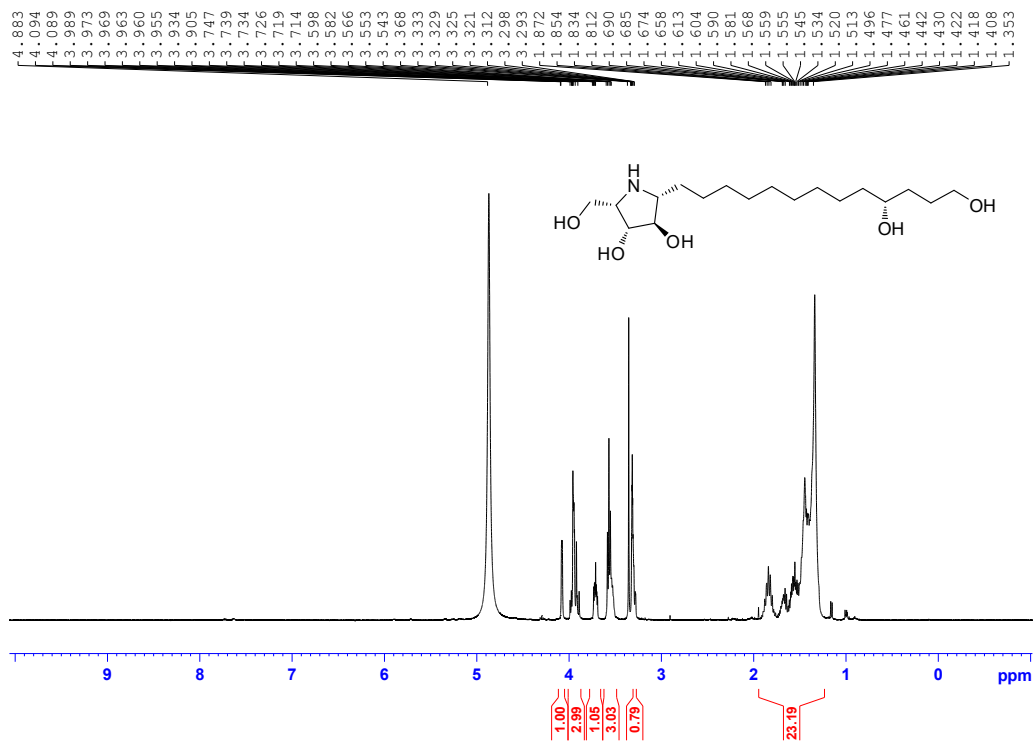

Figure S65

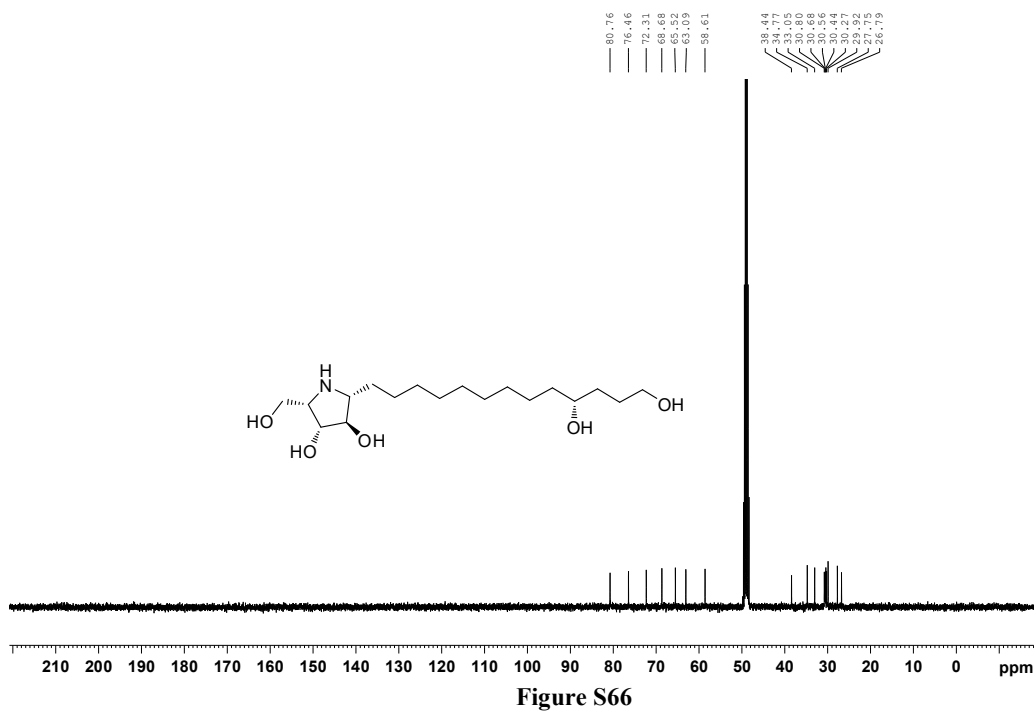

Figure S66



# HPLC Analysis of Compounds 15 and *ent*-15

## Compound 15

Data File C:\CHEM32\1\DATA\WQK\1509.D  
Sample Name: 150901

```
=====
Acq. Operator   : WQK
Acq. Instrument : Instrument 1           Location : Vial 1
Injection Date  : 2016-9-28 9:04:04
Acq. Method     : C:\CHEM32\1\METHODS\JWQ20121205.M
Last changed    : 2016-9-28 9:02:24 by WQK
                 (modified after loading)
Analysis Method : C:\CHEM32\1\METHODS\JWQ20121205.M
Last changed    : 2016-9-28 10:26:48 by WQK
                 (modified after loading)
Sample Info     : OD-H H/I=95:5  1 ml/min, 220nm
=====
```

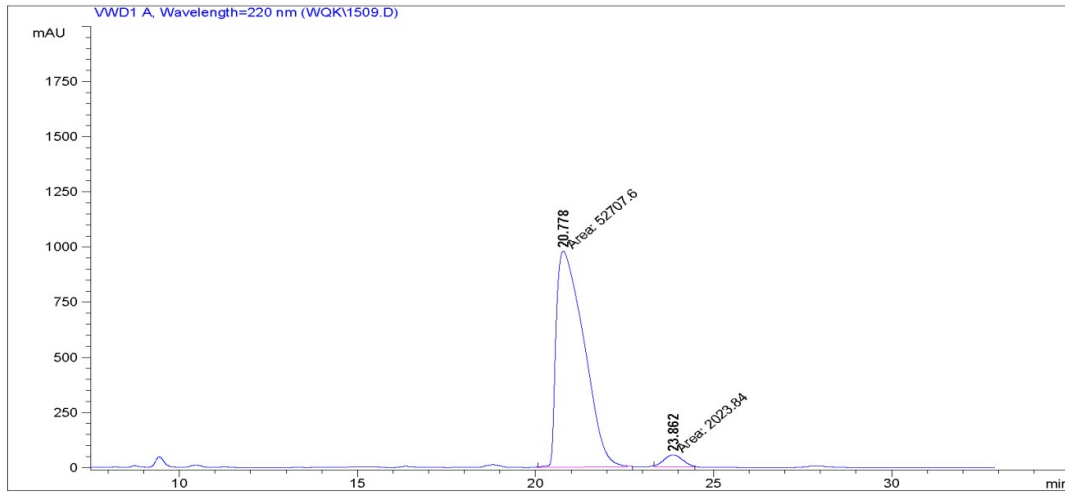

### Area Percent Report

```
Sorted By      : Signal
Multiplier     : 1.0000
Dilution       : 1.0000
Sample Amount  : 1.00000 [ng/ul] (not used in calc.)
Use Multiplier & Dilution Factor with ISTDs
```

Signal 1: VWD1 A, Wavelength=220 nm

| Peak #   | RetTime [min] | Type | Width [min] | Area mAU   | Height [mAU] | Area %  |
|----------|---------------|------|-------------|------------|--------------|---------|
| 1        | 20.778        | MM   | 0.8965      | 5.27076e4  | 979.92041    | 96.3022 |
| 2        | 23.862        | MM   | 0.6126      | 2023.84094 | 55.06227     | 3.6978  |
| Totals : |               |      |             | 5.47315e4  | 1034.98268   |         |

\*\*\* End of Report \*\*\*

Figure S67

# Compound *ent-15*

Data File C:\CHEM32\1\DATA\WQK\ENT1509.D  
Sample Name: ent150901

```
=====
Acq. Operator   : WQK
Acq. Instrument : Instrument 1                      Location : Vial 1
Injection Date  : 2016-9-28 9:38:39
Acq. Method     : C:\CHEM32\1\METHODS\JWQ20121205.M
Last changed    : 2016-9-28 9:02:24 by WQK
                 (modified after loading)
Analysis Method : C:\CHEM32\1\METHODS\JWQ20121205.M
Last changed    : 2016-9-28 10:31:20 by WQK
                 (modified after loading)
Sample Info     : OD-H H/I=95:5 1 ml/min, 220nm
=====
```

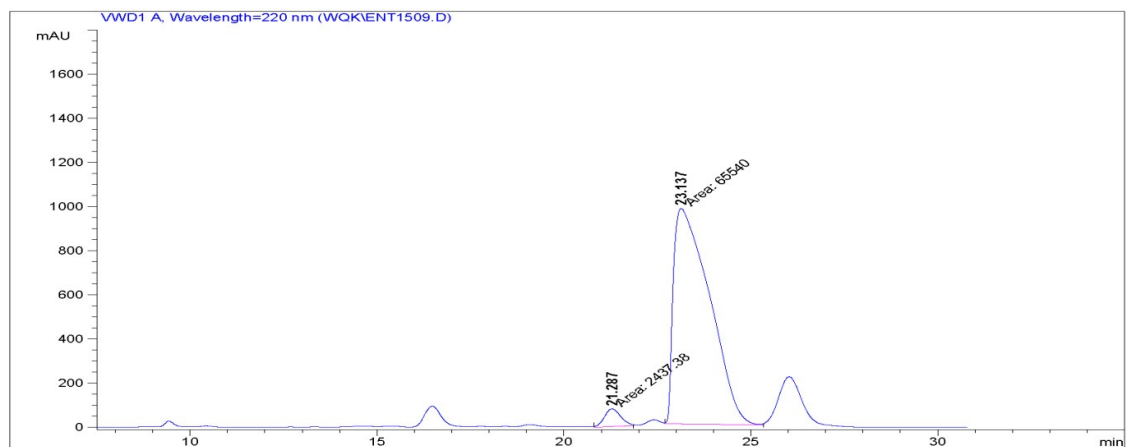

## Area Percent Report

```
=====
Sorted By      : Signal
Multiplier     : 1.0000
Dilution       : 1.0000
Sample Amount  : 1.00000 [ng/ul] (not used in calc.)
Use Multiplier & Dilution Factor with ISTDs
=====
```

Signal 1: VWD1 A, Wavelength=220 nm

| Peak # | RetTime [min] | Type | Width [min] | Area mAU   | Area *s | Height [mAU] | Area %  |
|--------|---------------|------|-------------|------------|---------|--------------|---------|
| 1      | 21.287        | MM   | 0.5060      | 2437.37939 |         | 80.27544     | 3.5856  |
| 2      | 23.137        | MM   | 1.1179      | 6.55400e4  |         | 977.14410    | 96.4144 |

Totals : 6.79774e4 1057.41954

\*\*\* End of Report \*\*\*

Figure S68
